# Supplementary material
Source: PubMed Central journal article supplement (PMC4888580)
Supplement: supp_nfw013_poq_14_0123_File008.pdf [file supp_nfw013_poq_14_0123_File008.pdf]

## **End of Manuscript. Additional Online Material Included for Purposes of Review**

### **Appendix 1. Question Wording and Summary Statistics for Dependent Variables**

#### *Affirmative action for Blacks:*

2008: What about your opinion -- are you FOR or AGAINST preferential hiring and promotion of blacks? Do you favor preference in hiring and promotion STRONGLY or NOT STRONGLY?/Do you oppose preference in hiring and promotion STRONGLY or NOT STRONGLY? (ANES: V085157, V085157a, V085157b, "affirmative action")

*Coded:* 0 to 1, where 0 means strongly against and 1 means strongly in support

2012: What about your opinion -- are you FOR or AGAINST preferential hiring and promotion of blacks? Do you favor preference in hiring and promotion STRONGLY or NOT STRONGLY?/Do you oppose preference in hiring and promotion STRONGLY or NOT STRONGLY? (ANES: aapost\_hire, aapost\_hirefav, aapost\_hireopp)

*Coded:* 0 to 1, where 0 means strongly against and 1 means strongly support.

#### *Government assistance to Blacks:*

2008: Where would you place YOURSELF on this scale, or haven't you thought much about this? 1. Govt should help blacks 2. 3. 4. 5. 6. 7. Blacks should help themselves (ANES: V083137, "aid to blacks")

*Coded:* 0 to 1, with above scale reversed such that 0 means that Blacks should help themselves, and 1 means that government should help the Blacks.

2012: Where would you place YOURSELF on this scale, or haven't you thought much about this? 1. Govt should help blacks 2. 3. 4. 5. 6. 7. Blacks should help themselves (ANES: aidblack\_self, "aid to blacks")

*Coded:* 0 to 1, with above scale reversed such that 0 means that Blacks should help themselves, and 1 means that government should help Blacks.

#### *Fair treatment in jobs for Blacks:*

2008: How do you feel? Should the government in Washington see to it that black people get fair treatment in jobs OR is this not the federal government's business? (ANES: V085079a, branched from V085079, "fair jobs")

*Coded:* 0 or 1, where 0 means that it is not the federal government's business and 1 means that it is the government's responsibility to "see to it that black people get fair treatment in jobs"

2012: Should the government in Washington see to it that black people get fair treatment in jobs or is this not the federal government's business? Do you feel strongly or not strongly that this is/is not the federal government's business? (ANES: fairjob\_opin, fairjob\_yes, fairjobs\_no, there is no first branching question in 2012, "fair jobs")

*Coded:* 0 to 1, where 0 means that it is not the federal government's business and 1 means that it is the government's responsibility to "see to it that black people get fair treatment in jobs"

#### *Death Penalty:*

2008: Do you FAVOR or OPPOSE the death penalty for persons convicted of murder? Do you favor the death penalty for persons convicted of murder STRONGLY or NOT STRONGLY? / Do you oppose the death penalty for persons convicted of murder STRONGLY or NOT STRONGLY?(ANES: V083163, V083163a, "death penalty")

*Coded:* 0 to 1, where 0 means the respondent strongly opposes the death penalty and 1 means respondent strongly supports the death penalty.

2012: Do you favor or oppose the death penalty for persons convicted of murder? Do you favor the death penalty for persons convicted of murder strongly or not strongly? / Do you oppose the death penalty for persons convicted of murder strongly or not strongly?(ANES: penalty\_favdpn, penalty\_dpensr, “death penalty”)

*Coded:* 0 to 1, where 0 means the respondent strongly opposes the death penalty and 1 means respondent strongly supports the death penalty.

#### *Welfare:*

2008: What about WELFARE PROGRAMS? Should federal spending on welfare programs be INCREASED, DECREASED, or kept ABOUT THE SAME? Should it be increased A GREAT DEAL, A MODERATE AMOUNT, or A LITTLE? / Should it be decreased A GREAT DEAL, A MODERATE AMOUNT, or A LITTLE? (ANES: V083145, V083145a “welfare”)

*Coded:* 0 to 1, where 0 means welfare should be decreased a great deal and 1 means welfare spending should be increased a great deal

2012: WELFARE PROGRAMS (Should federal spending be INCREASED, DECREASED, or kept [ABOUT THE SAME / THE SAME]?) (ANES: fedspend\_welfare, “welfare”)

*Coded:* 0 to 1, where 1 means spending should be increased and 0 means spending should be decreased.

#### *Vote choice:*

2008: Who did you vote for? (ANES: V085044a, voters and V085046a, non-voters, “vote Obama”)

*Coded:* 0 or 1, where 1 means voted for Obama (or supports Obama for models that rely on non-voters), 0 means did not vote (or support) Obama

2012: Who did you vote for? (ANES: presvote2012\_x)

*Coded:* 0 or 1, where 1 means voted for Obama.

#### *Prejudice Measures:*

##### *Stereotype Index*

2008: [lazy/intelligent] Where would you rate WHITES on this scale? Where would you rate BLACKS on this scale? (ANES: 083208b, V083207b, V083207a, V083208a “negative stereotypes”)

*Coded:* 0 to 1, where higher values mean the respondents has more negative stereotypes of blacks.

2012: [lazy/intelligent] Where would you rate WHITES in general on this scale? Where would you rate BLACKS on this scale? (ANES: stype\_intwhite, stype\_intblack, stype\_hwkwhite, stype\_hwkblack, “negative stereotypes”)

*Coded:* 0 to 1, where higher values mean the respondents has more negative stereotypes of blacks.

##### *Sympathy measure:*

2008: How often have you felt sympathy for Blacks? VERY often, FAIRLY often, NOT TOO often, or NEVER? (ANES: V085115, “denial of sympathy”)

*Coded:* 0 to 1, reversed, where 1 means a respondent never feels sympathy

2012: How often have you felt sympathy for Blacks? [ALWAYS, MOST OF THE TIME, ABOUT HALF THE TIME, SOME OF THE TIME, or NEVER / NEVER, SOME OF THE TIME, ABOUT HALF THE TIME, MOST OF THE TIME, or ALWAYS] (ANES: racecasi\_sympblacks, “denial of sympathy”)

*Coded:* 0 to 1, reversed, where 1 means a respondent never feels sympathy.

*Racial Resentment:*

2008: Index created from four questions: Do you [AGREE STRONGLY, AGREE SOMEWHAT, NEITHER AGREE NOR DISAGREE, DISAGREE SOMEWHAT, or DISAGREE STRONGLY / DISAGREE STRONGLY, DISAGREE SOMEWHAT, NEITHER AGREE NOR DISAGREE, AGREE SOMEWHAT, or AGREE STRONGLY] with this statement? (1) Irish, Italians, Jewish and many other minorities overcame prejudice and worked their way up. Blacks should do the same without any special favors; (2) Generations of slavery and discrimination have created conditions that make it difficult for blacks to work their way out of the lower class; (3) Over the past few years, blacks have gotten less than they deserve; (4) It's really a matter of some people not trying hard enough; if blacks would only try harder they could be just as well off as whites. (ANES: V085143, V085144, V085145, V085146, “racial resentment”).

*Coded:* averaged, and scaled 0 to 1, where 1 is the highest level of racial resentment.

2012: Index created from four questions: Do you [AGREE STRONGLY, AGREE SOMEWHAT, NEITHER AGREE NOR DISAGREE, DISAGREE SOMEWHAT, or DISAGREE STRONGLY / DISAGREE STRONGLY, DISAGREE SOMEWHAT, NEITHER AGREE NOR DISAGREE, AGREE SOMEWHAT, or AGREE STRONGLY] with this statement? (1) Irish, Italians, Jewish and many other minorities over- came prejudice and worked their way up. Blacks should do the same without any special favors; (2) Generations of slavery and discrimination have created conditions that make it difficult for blacks to work their way out of the lower class; (3) Over the past few years, blacks have gotten less than they deserve; (4) It's really a matter of some people not trying hard enough; if blacks would only try harder they could be just as well off as whites. (ANES: resent\_workway, resent\_slavery, resent\_deserve, resent\_try, “racial resentment”)

*Coded:* averaged, and scaled 0 to 1, where 1 is the highest level of racial resentment.

| <i>Summary Statistics, 2008 and 2012<sup>a</sup> (weighted)</i>                                  |                                      |                                     |                                     |                                      |
|--------------------------------------------------------------------------------------------------|--------------------------------------|-------------------------------------|-------------------------------------|--------------------------------------|
|                                                                                                  | Whites                               | US-Born Latinos                     | Foreign-Born Latinos                | Blacks                               |
| <i>Affirmative Action, 0 (strongly against) to 1 (strongly support)</i>                          |                                      |                                     |                                     |                                      |
| 2008                                                                                             | Mean = 0.16<br>SD = 0.01<br>N = 1086 | Mean = 0.28<br>SD = 0.02<br>N = 438 | Mean = 0.30<br>SD = 0.04<br>N = 124 | Mean = 0.56<br>SD = 0.02<br>N = 0.56 |
| 2012                                                                                             | Mean = 0.16<br>SD = 0.01<br>N=834    | Mean = 0.21<br>SD = 0.03<br>N = 303 | Mean = 0.25<br>SD = 0.05<br>N = 104 | Mean = 0.56<br>SD = 0.03<br>N=451    |
| <i>Aid to Blacks, 0 (Blacks should help themselves) to 1 (government should help the Blacks)</i> |                                      |                                     |                                     |                                      |
| 2008                                                                                             | Mean = 0.31<br>SD = 0.01<br>N = 971  | Mean = 0.43<br>SD = 0.02<br>N = 353 | Mean = 0.52<br>SD = 0.04<br>N = 104 | Mean = 0.61<br>SD = 0.02<br>N = 486  |

|                                                                                            |                                      |                                     |                                     |                                      |
|--------------------------------------------------------------------------------------------|--------------------------------------|-------------------------------------|-------------------------------------|--------------------------------------|
| 2012                                                                                       | Mean = 0.31<br>SD = 0.01<br>N = 785  | Mean = 0.43<br>SD = 0.03<br>N = 277 | Mean = 0.44<br>SD = 0.05<br>N = 105 | Mean = 0.56<br>SD = 0.02<br>N = 438  |
| <i>Fair Jobs</i> , 0 (not government's business) to 1 (government's business) <sup>b</sup> |                                      |                                     |                                     |                                      |
| 2008 <sup>c</sup>                                                                          | Mean = 0.47<br>SD = 0.01<br>N = 1101 | Mean = 0.56<br>SD = 0.02<br>N = 448 | Mean = 0.57<br>SD = 0.04<br>N = 125 | Mean = 0.76<br>SD = 0.01<br>N = 566  |
| 2012                                                                                       | Mean = 0.47<br>SD = 0.02<br>N = 804  | Mean = 0.51<br>SD = 0.04<br>N = 292 | Mean = 0.58<br>SD = 0.06<br>N = 111 | Mean = 0.81<br>SD = 0.03<br>N = 456  |
| <i>Death Penalty</i> , 0 (strongly oppose) to 1 (strongly support)                         |                                      |                                     |                                     |                                      |
| 2008                                                                                       | Mean = 0.72<br>SD = 0.01<br>N = 1062 | Mean = 0.61<br>SD = 0.03<br>N = 418 | Mean = 0.52<br>SD = 0.05<br>N = 116 | Mean = 0.46<br>SD = 0.02<br>N = 500  |
| 2012                                                                                       | Mean = 0.72<br>SD = 0.01<br>N = 872  | Mean = 0.67<br>SD = 0.03<br>N = 325 | Mean = 0.57<br>SD = 0.05<br>N = 117 | Mean = 0.51<br>SD = 0.03<br>N = 466  |
| <i>Welfare</i> , 0 (decreased) to 1 (increased) <sup>b</sup>                               |                                      |                                     |                                     |                                      |
| 2008                                                                                       | Mean = 0.65<br>SD = 0.01<br>N = 1089 | Mean = 0.65<br>SD = 0.02<br>N = 444 | Mean = 0.70<br>SD = 0.03<br>N = 126 | Mean = 0.76<br>SD = 0.01<br>N = 557  |
| 2012                                                                                       | Mean = 0.32<br>SD = 0.01<br>N = 892  | Mean = 0.47<br>SD = 0.03<br>N = 340 | Mean = 0.49<br>SD = 0.06<br>N = 119 | Mean = 0.53<br>SD = 0.03<br>N = 506  |
| <i>Vote Choice 1</i> , 1 (vote for Obama), 0 (voted other candidate)                       |                                      |                                     |                                     |                                      |
| 2008                                                                                       | Mean = 0.43<br>SD = 0.02<br>N = 871  | Mean = 0.69<br>SD = 0.04<br>N = 310 | Mean = 0.72<br>SD = 0.06<br>N = 86  | Mean = 0.99<br>SD = 0.01<br>N = 469  |
| 2012 (FTF)                                                                                 | Mean = 0.40<br>SD = 0.02<br>N = 622  | Mean = 0.82<br>SD = 0.04<br>N = 181 | Mean = 0.62<br>SD = 0.10<br>N = 70  | Mean = 0.98<br>SD = 0.01<br>N = 391  |
| 2012 (Full)                                                                                | Mean = 0.41<br>SD = 0.01<br>N = 2616 | Mean = 0.69<br>SD = 0.04<br>N = 415 | Mean = 0.75<br>SD = 0.05<br>N = 210 | Mean = 0.96<br>SD = 0.01<br>N = 803  |
| <i>Vote Choice 2</i> , 1 (vote for Obama), 0 (voted other candidate or did not vote)       |                                      |                                     |                                     |                                      |
| 2008                                                                                       | Mean = 0.36<br>SD = 0.02<br>N = 1088 | Mean = 0.48<br>SD = 0.03<br>N = 446 | Mean = 0.45<br>SD = 0.05<br>N = 127 | Mean = 0.78<br>SD = 0.04<br>N = 563  |
| 2012 (FTF)                                                                                 | Mean = 0.29<br>SD = 0.02<br>N = 906  | Mean = 0.43<br>SD = 0.04<br>N = 342 | Mean = 0.38<br>SD = 0.06<br>N = 123 | Mean = 0.76<br>SD = 0.03<br>N = 511  |
| 2012 (Full)                                                                                | Mean = 0.31<br>SD = 0.01<br>N = 3412 | Mean = 0.42<br>SD = 0.03<br>N = 672 | Mean = 0.47<br>SD = 0.04<br>N = 317 | Mean = 0.73<br>SD = 0.02<br>N = 1011 |
| <i>Stereotypes of Blacks: Lazy</i> [1 to 7]                                                |                                      |                                     |                                     |                                      |
| 2008                                                                                       | Mean = 4.08                          | Mean = 3.86                         | Mean = 4.31                         | Mean = 2.87                          |

|                                                                   |                                      |                                     |                                     |                                     |
|-------------------------------------------------------------------|--------------------------------------|-------------------------------------|-------------------------------------|-------------------------------------|
|                                                                   | SD = 0.05<br>N = 1073                | SD = 0.09<br>N = 445                | SD = 0.20<br>N = 123                | SD = 0.09<br>N = 557                |
| 2012                                                              | Mean = 3.99<br>SD = 0.05<br>N = 860  | Mean = 4.07<br>SD = 0.12<br>N = 322 | Mean = 4.30<br>SD = 0.20<br>N = 117 | Mean = 2.83<br>SD = 0.11<br>N = 476 |
| <i>Stereotypes of Blacks: Unintelligent [1 to 7]</i>              |                                      |                                     |                                     |                                     |
| 2008                                                              | Mean = 3.71<br>SD = 0.05<br>N = 1076 | Mean = 3.64<br>SD = 0.08<br>N = 442 | Mean = 3.76<br>SD = 0.14<br>N = 126 | Mean = 2.64<br>SD = 0.07<br>N = 557 |
| 2012                                                              | Mean = 3.62<br>SD = 0.05<br>N = 860  | Mean = 3.53<br>SD = 0.09<br>N = 322 | Mean = 3.46<br>SD = 0.20<br>N = 116 | Mean = 2.56<br>SD = 0.09<br>N = 476 |
| <i>Denial of Sympathy for Blacks<sup>b</sup></i>                  |                                      |                                     |                                     |                                     |
| 2008                                                              | Mean = 0.56<br>SD = 0.01<br>N = 1091 | Mean = 0.55<br>SD = 0.02<br>N = 447 | Mean = 0.49<br>SD = 0.03<br>N = 124 | Mean = 0.34<br>SD = 0.02<br>N = 562 |
| 2012                                                              | Mean = 0.70<br>SD = 0.01<br>N = 862  | Mean = 0.67<br>SD = 0.02<br>N = 322 | Mean = 0.63<br>SD = 0.03<br>N = 117 | Mean = 0.41<br>SD = 0.02<br>N = 478 |
| <i>Partisanship, 0 (strong Democrat) to 1 (strong Republican)</i> |                                      |                                     |                                     |                                     |
| 2008                                                              | Mean = 0.52<br>SD = 0.01<br>N = 1099 | Mean = 0.39<br>SD = 0.02<br>N = 445 | Mean = 0.36<br>SD = 0.04<br>N = 126 | Mean = 0.19<br>SD = 0.01<br>N = 564 |
| 2012                                                              | Mean = 0.54<br>SD = 0.01<br>N = 908  | Mean = 0.31<br>SD = 0.02<br>N = 343 | Mean = 0.32<br>SD = 0.04<br>N = 125 | Mean = 0.15<br>SD = 0.01<br>N = 505 |
| <i>Limited Government, 1 (more limited government)</i>            |                                      |                                     |                                     |                                     |
| 2008                                                              | Mean = 0.45<br>SD = 0.01<br>N = 1069 | Mean = 0.28<br>SD = 0.03<br>N = 431 | Mean = 0.24<br>SD = 0.03<br>N = 123 | Mean = 0.17<br>SD = 0.01<br>N = 552 |
| 2012                                                              | Mean = 0.50<br>SD = 0.02<br>N = 860  | Mean = 0.29<br>SD = 0.03<br>N = 321 | Mean = 0.26<br>SD = 0.06<br>N = 118 | Mean = 0.16<br>SD = 0.02<br>N = 480 |
| <i>Egalitarianism, 1 (more egalitarian)</i>                       |                                      |                                     |                                     |                                     |
| 2008                                                              | Mean = 0.60<br>SD = 0.01<br>N = 1100 | Mean = 0.65<br>SD = 0.01<br>N = 445 | Mean = 0.61<br>SD = 0.02<br>N = 125 | Mean = 0.74<br>SD = 0.01<br>N = 565 |
| 2012                                                              | Mean = 0.59<br>SD = 0.01<br>N = 864  | Mean = 0.65<br>SD = 0.01<br>N = 322 | Mean = 0.58<br>SD = 0.03<br>N = 118 | Mean = 0.75<br>SD = 0.01<br>N = 481 |
| <i>Age, 0 to 1, (categorized, 1 is oldest)</i>                    |                                      |                                     |                                     |                                     |
| 2008                                                              | Mean = 0.40<br>SD = 0.01<br>N = 1090 | Mean = 0.31<br>SD = 0.01<br>N = 448 | Mean = 0.40<br>SD = 0.03<br>N = 125 | Mean = 0.35<br>SD = 0.01<br>N = 566 |
| 2012                                                              | Mean = 0.55<br>SD = 0.01             | Mean = 0.30<br>SD = 0.02            | Mean = 0.50<br>SD = 0.03            | Mean = 0.41<br>SD = 0.02            |

|                                                          | N = 894                               | N = 336                             | N = 117                             | N = 500                             |
|----------------------------------------------------------|---------------------------------------|-------------------------------------|-------------------------------------|-------------------------------------|
| <i>Male, 1 (male)</i>                                    |                                       |                                     |                                     |                                     |
| 2008                                                     | Mean = 0.45<br>SD = 0.02<br>N = 1110  | Mean = 0.45<br>SD = 0.03<br>N = 451 | Mean = 0.46<br>SD = 0.06<br>N = 128 | Mean = 0.42<br>SD = 0.03<br>N = 572 |
| 2012                                                     | Mean = 0.48<br>SD = 0.02<br>N = 918   | Mean = 0.51<br>SD = 0.04<br>N = 346 | Mean = 0.42<br>SD = 0.07<br>N = 126 | Mean = 0.49<br>SD = 0.03<br>N = 511 |
| <i>Income, 0 to 1 (1 is highest income point)</i>        |                                       |                                     |                                     |                                     |
| 2008                                                     | Mean = 0.43<br>SD = 0.01<br>N = 1046  | Mean = 0.38<br>SD = 0.02<br>N = 427 | Mean = 0.38<br>SD = 0.03<br>N = 115 | Mean = 0.33<br>SD = 0.01<br>N = 531 |
| 2012                                                     | Mean = 0.55<br>SD = 0.01<br>N = 787   | Mean = 0.38<br>SD = 0.02<br>N = 276 | Mean = 0.41<br>SD = 0.05<br>N = 101 | Mean = 0.34<br>SD = 0.02<br>N = 397 |
| <i>Education, 0 to 1 (highest education)<sup>b</sup></i> |                                       |                                     |                                     |                                     |
| 2008                                                     | Mean = 0.80<br>SD = 0.004<br>N = 1107 | Mean = 0.78<br>SD = 0.01<br>N = 449 | Mean = 0.66<br>SD = 0.03<br>N = 128 | Mean = 0.74<br>SD = 0.01<br>N = 570 |
| 2012                                                     | Mean = 0.50<br>SD = 0.01<br>N = 910   | Mean = 0.37<br>SD = 0.02<br>N = 346 | Mean = 0.38<br>SD = 0.04<br>N = 125 | Mean = 0.40<br>SD = 0.02<br>N = 505 |
| <i>Racial Resentment, 0 to 1 (highest resentment)</i>    |                                       |                                     |                                     |                                     |
| 2008                                                     | Mean = 0.65<br>SD = 0.01<br>N = 1099  | Mean = 0.57<br>SD = 0.01<br>N = 444 | Mean = 0.57<br>SD = 0.02<br>N = 120 | Mean = 0.47<br>SD = 0.01<br>N = 559 |
| 2012                                                     | Mean = 0.64<br>SD = 0.01<br>N = 862   | Mean = 0.64<br>SD = 0.02<br>N = 322 | Mean = 0.66<br>SD = 0.03<br>N = 118 | Mean = 0.45<br>SD = 0.02<br>N = 480 |

<sup>a</sup> 2012 results use FTF interviews.

<sup>b</sup> Response options differ in 2008 and 2012 and cannot be compared directly.

<sup>c</sup> In 2008, an initial question measured whether respondents were interested in this issue. Those who were not interested were subsequently not asked the follow-up opinion questions. The data in the table includes those who said they were “uninterested” as the mid-point. If these respondents are excluded the patterns are as follows: Whites, mean = 0.44, SD = 0.02, N = 642; US-born Latinos, mean = 0.62, SD = 0.04, N = 239; Foreign-born Latinos, mean = 0.61, SD = 0.07, N = 75; Blacks, mean = 0.90, SD = 0.02, N = 386.

### Appendix 2. 2008 Data

In this appendix present the coefficients on the control variables from in-text Tables 1 and 2 (shown in Tables A1, A2 and A3).

*Table A1. Latinos (U.S.-born), Results with Controls (in-text Tables 1 and 2)*

|                    | Aff. Action        | Aid to Blacks      | Fair Jobs          | Death Pen.        | Welfare            | Vote Choice        |
|--------------------|--------------------|--------------------|--------------------|-------------------|--------------------|--------------------|
| Neg. Stereotypes   | -0.10<br>(0.09)    | -0.24***<br>(0.08) | -0.32***<br>(0.12) | 0.08<br>(0.10)    | -0.19***<br>(0.08) | -0.55<br>(1.21)    |
| Denial of Sympathy | -0.23***<br>(0.07) | -0.18***<br>(0.06) | -0.46***<br>(0.09) | 0.16**<br>(0.08)  | 0.03<br>(0.07)     | -1.57*<br>(0.82)   |
| Party ID           | -0.20***<br>(0.06) | -0.21***<br>(0.06) | -0.09<br>(0.09)    | 0.16*<br>(0.08)   | -0.04<br>(0.07)    | -4.10***<br>(0.81) |
| Limited Govt       | -0.00<br>(0.06)    | -0.08<br>(0.06)    | -0.14<br>(0.10)    | 0.04<br>(0.08)    | -0.01<br>(0.08)    | -1.16*<br>(0.69)   |
| Egalitarianism     | 0.12<br>(0.12)     | 0.16<br>(0.11)     | 0.43**<br>(0.18)   | -0.24*<br>(0.14)  | 0.25***<br>(0.12)  | 1.59<br>(1.28)     |
| Age                | -0.05<br>(0.10)    | -0.07<br>(0.08)    | -0.12<br>(0.12)    | -0.02<br>(0.12)   | -0.07<br>(0.10)    | -2.35**<br>(1.02)  |
| Male               | -0.02<br>(0.04)    | -0.03<br>(0.04)    | 0.04<br>(0.05)     | 0.01<br>(0.05)    | 0.05<br>(0.04)     | -0.90*<br>(0.47)   |
| Income             | -0.14<br>(0.09)    | -0.16*<br>(0.08)   | 0.04<br>(0.13)     | 0.22***<br>(0.11) | -0.16*<br>(0.08)   | 2.29**<br>(1.04)   |
| Income - Missing   | 0.10<br>(0.11)     | -0.15<br>(0.09)    | -0.04<br>(0.12)    | -0.13<br>(0.12)   | -0.01<br>(0.09)    | --<br>--           |
| Education          | -0.19<br>(0.15)    | -0.00<br>(0.15)    | -0.36*<br>(0.21)   | 0.07<br>(0.18)    | -0.01<br>(0.17)    | -2.51<br>(1.61)    |
| Constant           | 0.67***<br>(0.17)  | 0.73***<br>(0.15)  | 1.10***<br>(0.21)  | 0.44**<br>(0.20)  | 0.64***<br>(0.16)  | 5.51***<br>(2.02)  |
| N                  | 451                | 451                | 451                | 451               | 451                | 296                |
| F-stat             | 6.95               | 10.09              | 10.08              | 4.82              | 2.21               | 7.12               |

*See notes on Tables 1 and 2 for additional details.*

**Appendix 2, Continued.**

*Table A2. Latinos (foreign-born), Results with Controls (in-text Tables 1 and 2)*

|                    | Aff. Action        | Aid to Blacks     | Fair Jobs         | Death Pen.       | Welfare           | Vote Choice        |
|--------------------|--------------------|-------------------|-------------------|------------------|-------------------|--------------------|
| Neg. Stereotypes   | -0.09<br>(0.15)    | -0.03<br>(0.15)   | -0.31<br>(0.19)   | 0.10<br>(0.18)   | -0.10<br>(0.10)   | -3.14<br>(2.87)    |
| Denial of Sympathy | -0.03<br>(0.12)    | -0.22*<br>(0.12)  | -0.25*<br>(0.15)  | 0.15<br>(0.15)   | -0.07<br>(0.09)   | -1.91*<br>(1.00)   |
| Party ID           | -0.25***<br>(0.10) | -0.10<br>(0.12)   | -0.10<br>(0.14)   | 0.05<br>(0.13)   | 0.09<br>(0.07)    | -8.06***<br>(2.27) |
| Limited Govt       | -0.08<br>(0.12)    | -0.32**<br>(0.12) | -0.06<br>(0.21)   | -0.15<br>(0.18)  | -0.19*<br>(0.10)  | -3.02*<br>(1.66)   |
| Egalitarianism     | -0.58**<br>(0.24)  | -0.00<br>(0.12)   | 0.28<br>(0.36)    | -0.50<br>(0.32)  | 0.01<br>(0.20)    | 2.73<br>(2.58)     |
| Age                | -0.17<br>(0.19)    | -0.15<br>(0.14)   | -0.03<br>(0.22)   | 0.34*<br>(0.18)  | -0.05<br>(0.11)   | 0.89<br>(1.47)     |
| Male               | 0.02<br>(0.08)     | -0.02<br>(0.07)   | 0.06<br>(0.10)    | 0.18**<br>(0.08) | -0.11*<br>(0.06)  | 0.45<br>(0.95)     |
| Income             | 0.01<br>(0.16)     | -0.32*<br>(0.17)  | -0.22<br>(0.24)   | -0.03<br>(0.20)  | 0.26**<br>(0.12)  | 0.15<br>(1.87)     |
| Income - Missing   | 0.07<br>(0.16)     | -0.18<br>(0.13)   | 0.07<br>(0.18)    | 0.15<br>(0.16)   | 0.04<br>(0.12)    | -5.66***<br>(1.77) |
| Education          | -0.36**<br>(0.18)  | 0.08<br>(0.18)    | -0.53**<br>(0.23) | 0.20<br>(0.20)   | -0.06<br>(0.12)   | -2.92<br>(2.85)    |
| Constant           | 1.13***<br>(0.22)  | 0.88***<br>(0.23) | 1.17***<br>(0.29) | 0.39<br>(0.28)   | 0.80***<br>(0.17) | 8.22<br>(4.96)     |
| N                  | 128                | 128               | 128               | 128              | 128               | 81                 |
| F-stat             | 3.25               | 2.18              | 2.46              | 2.07             | 2.27              | 3.88               |

*See notes on Tables 1 and 2 for additional details.*



## Appendix 2, Continued

*Table A3. Whites (non-Latino), Results with Controls (in-text Tables 1 and 2)*

|                    | Aff. Action        | Aid to Blacks      | Fair Jobs          | Death Pen.         | Welfare            | Vote Choice        |
|--------------------|--------------------|--------------------|--------------------|--------------------|--------------------|--------------------|
| Neg. Stereotypes   | -0.03<br>(0.05)    | -0.17***<br>(0.05) | -0.38***<br>(0.08) | 0.12*<br>(0.07)    | 0.02<br>(0.05)     | -0.69<br>(0.73)    |
| Denial of Sympathy | -0.26***<br>(0.04) | -0.26***<br>(0.04) | -0.39***<br>(0.07) | 0.14***<br>(0.05)  | -0.02<br>(0.04)    | -0.92*<br>(0.51)   |
| Party ID           | -0.12***<br>(0.03) | -0.14***<br>(0.04) | -0.10*<br>(0.06)   | 0.14***<br>(0.04)  | 0.03<br>(0.03)     | -5.21***<br>(0.49) |
| Limited Govt       | -0.06**<br>(0.02)  | -0.06**<br>(0.03)  | -0.18***<br>(0.05) | 0.02<br>(0.04)     | -0.09***<br>(0.03) | -1.07***<br>(0.34) |
| Egalitarianism     | 0.13***<br>(0.05)  | 0.23***<br>(0.06)  | 0.46***<br>(0.11)  | -0.21***<br>(0.09) | 0.06<br>(0.07)     | 2.88***<br>(0.85)  |
| Age                | -0.07<br>(0.05)    | -0.05<br>(0.04)    | -0.07<br>(0.07)    | 0.07<br>(0.06)     | 0.07<br>(0.04)     | -1.47***<br>(0.54) |
| Male               | 0.02<br>(0.02)     | 0.03<br>(0.02)     | 0.07*<br>(0.04)    | 0.04*<br>(0.03)    | -0.02<br>(0.02)    | 0.28<br>(0.26)     |
| Income             | -0.07*<br>(0.04)   | -0.07*<br>(0.04)   | -0.01<br>(0.07)    | 0.13**<br>(0.06)   | -0.08*<br>(0.04)   | 0.33<br>(0.56)     |
| Income - Missing   | -0.03<br>(0.04)    | 0.02<br>(0.05)     | 0.00<br>(0.08)     | 0.09<br>(0.06)     | -0.05<br>(0.05)    | 0.25<br>(0.56)     |
| Education          | -0.10<br>(0.08)    | 0.18**<br>(0.09)   | -0.08<br>(0.16)    | -0.64***<br>(0.10) | -0.13<br>(0.08)    | -1.53<br>(1.20)    |
| Constant           | 0.46***<br>(0.09)  | 0.40***<br>(0.10)  | 0.80***<br>(0.15)  | 1.03***<br>(0.12)  | 0.76***<br>(0.09)  | 3.51***<br>(1.23)  |
| N                  | 1110               | 1110               | 1110               | 1110               | 1110               | 841                |
| F-stat             | 15.13              | 24.32              | 26.34              | 12.38              | 3.32               | 17.00              |

*See notes on Tables 1 and 2 for additional details.*

### Appendix 3. Changes in Specification, 2008

Below we present a set of analyses that shift the specification of our models in several different ways. First, we present results without multiple imputation (“No MI”), no control variables, (“No MI, No Controls”) and using semi-parametric imputation (“MI alternative”). In this MI alternative specification we use a semi-parametric approach to impute missing values only in the dependent variable, which is why the N is lower than in the multiple imputation approach that address listwise deletion by considering missings in all variables. In both cases,  $m = 100$ . In cases where we do not use OLS (vote choice, a version of the fair jobs variable) we rely on the semi-parametric approach due to the nature of estimation. We present these results alongside the results reported in the manuscript (“Table 1/2”) (Tables A4- A21). Across all specifications our results point to the same conclusions.

Without multiple imputation, the following percentages of cases would be lost due to listwise deletion. The rate of missing cases due to listwise deletion is as follows, by dependent variable. Affirmative action: 20.0% for US-born Latinos, 22.7% for foreign-born Latinos, 19.5% for whites; government aid to blacks: 38.4% for US-born Latinos, 36.0% for foreign-born Latinos, 29.0% for whites; welfare: 23.9% for US-born Latinos, 28.1% for foreign-born Latinos, 20.3% for whites; death penalty: 19.5% for US-born Latinos, 21.9% for foreign-born Latinos, 19.1% for whites; for respondents who answered the question about government efforts to end employment discrimination: 7.0% for US-born Latinos, 12.6% for foreign-born Latinos, and 13.2% among whites.

In addition, we also present a different approach to the “fair jobs” measure and the vote choice measure. The 2008 ANES asked respondents first if they were interested in the issue and only asked those respondents who said they were interested the actual opinion question. There are a number of ways of handling respondents who reported that they were not interested and we present the results of each in Tables A6, A12 and A18. Again, across all approaches our results point to the same conclusions.

We present an additional approach to the vote choice variable to retain consistency with the 2012 data analysis. Due to sample-size issues in 2012 we cannot include three different models of vote choice, each of which addresses the sample size issue. To increase sample size using the 2012 data we add additional interview cases (though these cases are from a different interview mode, over the internet), and estimate a model in which the dependent variable is coded 1 if the respondent voted for Obama and 0 if a respondent took any other behavior (voting for Romney, not voting at all). As we cannot add cases to the 2008 data, we estimate a model that uses a version of the dependent variable that incorporates the non-voters. We do so to retain consistency across datasets; here too we find similar results.

### Appendix 3.1 US-Born Latinos

Table A4. Latinos (US-Born), Affirmative Action Results, 2008

|                               | Table 1            | No MI              | No MI, No Controls | MI, alternative    |
|-------------------------------|--------------------|--------------------|--------------------|--------------------|
| Neg. Stereotypes - Blacks     | -0.10<br>(0.09)    | -0.10<br>(0.09)    | -0.13<br>(0.09)    | -0.12<br>(0.08)    |
| Denial of Sympathy for Blacks | -0.23***<br>(0.07) | -0.22***<br>(0.07) | -0.25***<br>(0.08) | -0.21***<br>(0.07) |
| Party ID                      | -0.20***<br>(0.06) | -0.19***<br>(0.06) | ---                | -0.16**<br>(0.07)  |
| Limited Government            | -0.00<br>(0.06)    | -0.00<br>(0.06)    | ---                | -0.02<br>(0.07)    |
| Egalitarianism                | 0.12<br>(0.12)     | 0.15<br>(0.12)     | ---                | 0.04<br>(0.12)     |
| Age                           | -0.05<br>(0.10)    | -0.07<br>(0.10)    | ---                | -0.07<br>(0.10)    |
| Male                          | -0.02<br>(0.04)    | -0.03<br>(0.04)    | ---                | -0.04<br>(0.04)    |
| Income                        | -0.14<br>(0.09)    | -0.12<br>(0.09)    | ---                | -0.13<br>(0.09)    |
| Income – Missing              | 0.10<br>(0.11)     | 0.12<br>(0.15)     | ---                | 0.14<br>(0.11)     |
| Education                     | -0.19<br>(0.15)    | -0.18<br>(0.16)    | ---                | -0.25<br>(0.16)    |
| Constant                      | 0.67***<br>(0.17)  | 0.64***<br>(0.18)  | 0.47***<br>(0.06)  | 0.73***<br>(0.16)  |
| N                             | 451                | 362                | 380                | 371                |
| F-statistic                   | 6.95               | 6.43               | 6.98               | 4.02               |

**Appendix 3.1, Continued**

*Table A5. Latinos (US-Born), Aid to Blacks Results, 2008*

|                               | Table 1            | No MI              | No MI, No Controls | MI, Alternative    |
|-------------------------------|--------------------|--------------------|--------------------|--------------------|
| Neg. Stereotypes – Blacks     | -0.24***<br>(0.08) | -0.23**<br>(0.09)  | -0.31***<br>(0.09) | -0.16**<br>(0.07)  |
| Denial of Sympathy for Blacks | -0.18***<br>(0.06) | -0.16**<br>(0.07)  | -0.25***<br>(0.07) | -0.15**<br>(0.06)  |
| Party ID                      | -0.21***<br>(0.06) | -0.23***<br>(0.07) | ---                | -0.25***<br>(0.07) |
| Limited Government            | -0.08<br>(0.06)    | -0.07<br>(0.07)    | ---                | -0.09<br>(0.06)    |
| Egalitarianism                | 0.16<br>(0.11)     | 0.18<br>(0.12)     | ---                | 0.06<br>(0.11)     |
| Age                           | -0.07<br>(0.08)    | -0.10<br>(0.08)    | ---                | -0.13<br>(0.09)    |
| Male                          | -0.03<br>(0.04)    | -0.04<br>(0.04)    | ---                | -0.01<br>(0.04)    |
| Income                        | -0.16*<br>(0.08)   | -0.15*<br>(0.08)   | ---                | -0.07<br>(0.08)    |
| Income – Missing              | -0.15<br>(0.09)    | -0.19<br>(0.13)    | ---                | -0.13<br>(0.11)    |
| Education                     | -0.00<br>(0.15)    | -0.08<br>(0.18)    | ---                | -0.11<br>(0.14)    |
| Constant                      | 0.73***<br>(0.15)  | 0.78***<br>(0.16)  | 0.71***<br>(0.06)  | 0.84***<br>(0.15)  |
| N                             | 451                | 279                | 296                | 371                |
| F-statistic                   | 10.09              | 12.66              | 16.25              | 5.49               |

**Appendix 3.1, Continued**

*Table A6. Latinos (US-Born), Fair Jobs Results, 2008*

|                               | Table 1            | Uninterested as<br>Mid-point | Uninterested<br>excluded | Second Question,<br>no controls |
|-------------------------------|--------------------|------------------------------|--------------------------|---------------------------------|
| Neg. Stereotypes - Blacks     | -0.38***<br>(0.08) | -0.13<br>(0.08)              | -0.30**<br>(0.14)        | -1.92**<br>(0.90)               |
| Denial of Sympathy for Blacks | -0.39***<br>(0.07) | -0.32***<br>(0.06)           | -0.61 ***<br>(0.09)      | -4.37***<br>(0.75)              |
| Party ID                      | -0.10*<br>(0.06)   | -0.05<br>(0.06)              | -0.06<br>(0.11)          | ---                             |
| Limited Government            | -0.18***<br>(0.05) | -0.05<br>(0.07)              | -0.16<br>(0.13)          | ---                             |
| Egalitarianism                | 0.46***<br>(0.11)  | 0.42***<br>(0.14)            | 0.33<br>(0.22)           | ---                             |
| Age                           | -0.07<br>(0.07)    | -0.04<br>(0.09)              | -0.20<br>(0.14)          | ---                             |
| Male                          | 0.07*<br>(0.04)    | -0.00<br>(0.04)              | 0.02<br>(0.06)           | ---                             |
| Income                        | -0.01<br>(0.07)    | 0.02<br>(0.09)               | 0.06<br>(0.15)           | ---                             |
| Income - Missing              | 0.00<br>(0.08)     | -0.00<br>(0.09)              | -0.09<br>(0.15)          | ---                             |
| Education                     | -0.08<br>(0.16)    | -0.21<br>(0.16)              | -0.41*<br>(0.26)         | ---                             |
| Constant                      | 0.80***<br>(0.15)  | 0.73***<br>(0.14)            | 1.30***<br>(0.22)        | 4.04***<br>(0.72)               |
| N                             | 1110               | 451                          | 242                      | 179                             |
| F-statistic                   | 26.34              | 7.91                         | 12.90                    | 18.88                           |

There are a number of approaches that can be taken to this branched question, which has three parts: (1) an introduction question that asks if people are interested, (2) a follow-up for those who are interested, and (3) a final follow-up to measure strength of positions. Table A6 presents four of these approaches. The first approach (which is shown in Table 1 of the main text) focuses on parts 2 and 3 of the branched question, but treats those who were uninterested (part 1) as missing, using multiple imputation to deal with these missings as well as any additional listwise deletion. This approach allows us to include those who said they were uninterested in the analysis. The second approach uses all three parts of the branched question by placing those who were uninterested at the mid-point, and uses multiple imputation to deal with listwise deletion. This second approach is somewhat weaker, as it places those people who stated they were uninterested in the first question at the mid-point, despite the fact that it is unclear that they would actually fall in that position. A third approach focuses only on parts 2 and 3 and includes only those who reported that they were interested, using multiple imputation to deal with any listwise deletion. A final approach still further limits the analysis, focusing only on part 2 of the branched question (without considering the strength of positions in part 3) and using no controls.

**Appendix 3.1, Continued**

*Table A7. Latinos (US-Born), Death Penalty Results, 2008*

|                               | Table 2          | No MI            | No MI, No Controls | MI Alternative    |
|-------------------------------|------------------|------------------|--------------------|-------------------|
| Neg. Stereotypes – Blacks     | 0.10<br>(0.18)   | 0.12<br>(0.10)   | 0.16<br>(0.11)     | 0.11<br>(0.10)    |
| Denial of Sympathy for Blacks | 0.15<br>(0.15)   | 0.15*<br>(0.08)  | 0.22**<br>(0.09)   | 0.14*<br>(0.08)   |
| Party ID                      | 0.05<br>(0.13)   | 0.17**<br>(0.09) | ---<br>---         | 0.16*<br>(0.07)   |
| Limited Government            | -0.15<br>(0.18)  | 0.04<br>(0.07)   | ---<br>---         | 0.04<br>(0.06)    |
| Egalitarianism                | -0.50<br>(0.32)  | -0.25*<br>(0.15) | ---<br>---         | -0.24<br>(0.15)   |
| Age                           | 0.34*<br>(0.18)  | -0.05<br>(0.12)  | ---<br>---         | -0.03<br>(0.12)   |
| Male                          | 0.18**<br>(0.08) | 0.02<br>(0.05)   | ---<br>---         | 0.02<br>(0.05)    |
| Income                        | -0.03<br>(0.20)  | 0.24**<br>(0.11) | ---<br>---         | 0.23**<br>(0.11)  |
| Income - Missing              | 0.15<br>(0.16)   | -0.12<br>(0.15)  | ---<br>---         | -0.13<br>(0.15)   |
| Education                     | 0.20<br>(0.20)   | 0.07<br>(0.20)   | ---<br>---         | 0.03<br>(0.19)    |
| Constant                      | 0.39<br>(0.28)   | 0.43**<br>(0.20) | 0.42***<br>(0.07)  | 0.46***<br>(0.15) |
| N                             | 128              | 344              | 359                | 423               |
| F-statistic                   | 2.07             | 5.04             | 5.10               | 4.68              |

**Appendix 3.1, Continued**

*Table A8. Latinos (US-Born), Welfare Results, 2008*

|                               | Table 2            | No MI             | No MI, No Controls | MI Alternative    |
|-------------------------------|--------------------|-------------------|--------------------|-------------------|
| Neg. Stereotypes - Blacks     | -0.19***<br>(0.08) | -0.20**<br>(0.08) | -0.22**<br>(0.08)  | -0.20**<br>(0.08) |
| Denial of Sympathy for Blacks | 0.03<br>(0.07)     | 0.00<br>(0.07)    | -0.01<br>(0.07)    | 0.01<br>(0.07)    |
| Party ID                      | -0.04<br>(0.07)    | -0.05<br>(0.07)   | ---                | -0.05<br>(0.07)   |
| Limited Government            | -0.01<br>(0.08)    | -0.00<br>(0.08)   | ---                | 0.00<br>(0.08)    |
| Egalitarianism                | 0.25***<br>(0.12)  | 0.25**<br>(0.12)  | ---                | 0.25**<br>(0.12)  |
| Age                           | -0.07<br>(0.10)    | -0.12<br>(0.11)   | ---                | -0.10<br>(0.11)   |
| Male                          | 0.05<br>(0.04)     | 0.06<br>(0.04)    | ---                | 0.06<br>(0.04)    |
| Income                        | -0.16*<br>(0.08)   | -0.17**<br>(0.09) | ---                | -0.16*<br>(0.09)  |
| Income - Missing              | -0.01<br>(0.09)    | -0.06<br>(0.10)   | ---                | -0.05<br>(0.10)   |
| Education                     | -0.01<br>(0.17)    | 0.05<br>(0.19)    | ---                | 0.02<br>(0.19)    |
| Constant                      | 0.64***<br>(0.16)  | 0.62***<br>(0.16) | 0.76***<br>(0.05)  | 0.63***<br>(0.16) |
| N                             | 451                | 364               | 383                | 422               |
| F-statistic                   | 2.21               | 2.50              | 4.52               | 4.68              |

### Appendix 3.1, Continued

*Table A9. Latinos (US-Born), Vote Choice Results, 2008*

|                               | Table 2            | No MI              | No MI, No Controls | Candidate Preference | With Non-Voters    |
|-------------------------------|--------------------|--------------------|--------------------|----------------------|--------------------|
| Neg. Stereotypes - Blacks     | -0.43<br>(1.22)    | -0.63<br>(1.29)    | -0.86<br>(0.76)    | -1.47*<br>(0.83)     | -1.02*<br>(0.60)   |
| Denial of Sympathy for Blacks | -1.81**<br>(0.81)  | -1.66**<br>(0.84)  | -1.63***<br>(0.52) | -1.81***<br>(0.58)   | -0.08<br>(0.56)    |
| Party ID                      | -4.47***<br>(0.84) | -4.33***<br>(0.84) | ---                | -3.42***<br>(0.61)   | -3.27***<br>(0.63) |
| Limited Government            | -1.28*<br>(0.69)   | -1.14<br>(0.71)    | ---                | -1.59***<br>(0.56)   | -0.00<br>(0.50)    |
| Egalitarianism                | 1.41<br>(1.27)     | 1.58<br>(1.36)     | ---                | 2.00*<br>(1.14)      | 2.76***<br>(0.93)  |
| Age                           | -2.65**<br>(1.04)  | -2.38**<br>(1.07)  | ---                | -2.01**<br>(0.85)    | 0.64<br>(0.72)     |
| Male                          | -0.79*<br>(0.47)   | -0.95*<br>(0.49)   | ---                | -0.51*<br>(0.36)     | -0.72**<br>(0.31)  |
| Income                        | 2.09**<br>(1.03)   | 2.45**<br>(1.10)   | ---                | 1.15<br>(0.84)       | 1.00<br>(0.80)     |
| Income - Missing              | --                 | --                 | ---                | -0.467<br>(0.92)     | -0.66<br>(1.13)    |
| Education                     | -2.03<br>(1.47)    | -2.21<br>(1.57)    | ---                | 2.54**<br>(1.25)     | 2.07*<br>(1.24)    |
| Constant                      | 5.60***<br>(1.95)  | 5.43**<br>(2.12)   | 2.17***<br>(0.44)  | 5.96***<br>(1.61)    | -1.92<br>(1.18)    |
| N                             | 308                | 234                | 255                | 416                  | 363                |
| F-statistic                   | 7.42               | 6.85               | 7.19               | 7.43                 | 7.40               |

In the particular case of the vote-choice variable, as a check we include a dependent variable that considers candidate preference rather than vote choice. This variable includes the preferences of those who did not vote. A second check – to ensure consistency with the 2012 data – is a measure that codes voting for Obama as 1 and people who voted for McCain, or did not vote at all as 0.



### Appendix 3.2. Foreign-born Latinos

Table A10. Latinos (Foreign-Born), Affirmative Action Results, 2008

|                               | Table 1            | No MI              | No MI, No Controls | MI Alternative     |
|-------------------------------|--------------------|--------------------|--------------------|--------------------|
| Neg. Stereotypes - Blacks     | -0.09<br>(0.15)    | -0.08<br>(0.16)    | -0.09<br>(0.16)    | -0.11<br>(0.15)    |
| Denial of Sympathy for Blacks | -0.03<br>(0.12)    | -0.01<br>(0.13)    | 0.02<br>(0.12)     | -0.01<br>(0.12)    |
| Party ID                      | -0.25***<br>(0.10) | -0.28***<br>(0.09) | ---                | -0.28***<br>(0.09) |
| Limited Government            | -0.08<br>(0.12)    | 0.03<br>(0.13)     | ---                | 0.01<br>(0.13)     |
| Egalitarianism                | -0.58**<br>(0.24)  | -0.73***<br>(0.24) | ---                | -0.68***<br>(0.24) |
| Age                           | -0.17<br>(0.19)    | -0.23<br>(0.21)    | ---                | -0.26<br>(0.21)    |
| Male                          | 0.02<br>(0.08)     | -0.04<br>(0.08)    | ---                | -0.02<br>(0.08)    |
| Income                        | 0.01<br>(0.16)     | 0.03<br>(0.17)     | ---                | 0.01<br>(0.17)     |
| Income - Missing              | 0.07<br>(0.16)     | 0.16<br>(0.17)     | ---                | 0.25<br>(0.17)     |
| Education                     | -0.36**<br>(0.18)  | -0.34*<br>(0.19)   | ---                | -0.32*<br>(0.19)   |
| Constant                      | 1.13***<br>(0.22)  | 1.20***<br>(0.22)  | 0.33***<br>(0.11)  | 1.18***<br>(0.22)  |
| N                             | 128                | 99                 | 106                | 115                |
| F-statistic                   | 3.25               | 4.57               | 0.20               | 5.02               |

**Appendix 3.2, Continued**

*Table A11. Latinos (Foreign-Born), Aid to Blacks Results, 2008*

|                               | Table 1           | No MI             | No MI, No Controls | MI Alternative    |
|-------------------------------|-------------------|-------------------|--------------------|-------------------|
| Neg. Stereotypes - Blacks     | -0.03<br>(0.15)   | -0.00<br>(0.16)   | 0.02<br>(0.19)     | -0.12<br>(0.16)   |
| Denial of Sympathy for Blacks | -0.22*<br>(0.12)  | -0.20<br>(0.13)   | -0.18<br>(0.12)    | -0.21*<br>(0.12)  |
| Party ID                      | -0.10<br>(0.12)   | -0.02<br>(0.13)   | ---                | -0.05<br>(0.11)   |
| Limited Government            | -0.32**<br>(0.12) | -0.32**<br>(0.14) | ---                | -0.19<br>(0.15)   |
| Egalitarianism                | -0.00<br>(0.12)   | -0.09<br>(0.18)   | ---                | -0.15<br>(0.24)   |
| Age                           | -0.15<br>(0.14)   | -0.24<br>(0.16)   | ---                | -0.09<br>(0.17)   |
| Male                          | -0.02<br>(0.07)   | -0.03<br>(0.08)   | ---                | -0.04<br>(0.07)   |
| Income                        | -0.32*<br>(0.17)  | -0.48**<br>(0.19) | ---                | -0.39**<br>(0.16) |
| Income - Missing              | -0.18<br>(0.13)   | -0.22<br>(0.14)   | ---                | -0.09<br>(0.16)   |
| Education                     | 0.08<br>(0.18)    | 0.04<br>(0.19)    | ---                | 0.06<br>(0.17)    |
| Constant                      | 0.88***<br>(0.23) | 1.05***<br>(0.23) | 0.59***<br>(0.13)  | 0.98***<br>(0.22) |
| N                             | 128               | 82                | 87                 | 104               |
| F-statistic                   | 2.18              | 3.28              | 0.3                | 1.51              |

### Appendix 3.2, Continued

Table A12. Latinos (Foreign-Born), Fair Jobs Results, 2008

|                               | Table 1           | Uninterested as<br>Mid-point | Uninterested<br>Excluded | Second<br>Question, no<br>controls |
|-------------------------------|-------------------|------------------------------|--------------------------|------------------------------------|
| Neg. Stereotypes - Blacks     | -0.31<br>(0.19)   | -0.17<br>(0.13)              | -0.15<br>(0.22)          | -1.12<br>(1.07)                    |
| Denial of Sympathy for Blacks | -0.25*<br>(0.15)  | -0.17<br>(0.11)              | -0.17<br>(0.19)          | -1.13<br>(1.02)                    |
| Party ID                      | -0.10<br>(0.14)   | -0.07<br>(0.11)              | -0.16<br>(0.16)          | ---                                |
| Limited Government            | -0.06<br>(0.21)   | 0.03<br>(0.15)               | 0.07<br>(0.28)           | ---                                |
| Egalitarianism                | 0.28<br>(0.36)    | 0.17<br>(0.26)               | 0.36<br>(0.39)           | ---                                |
| Age                           | -0.03<br>(0.22)   | -0.04<br>(0.17)              | -0.10<br>(0.26)          | ---                                |
| Male                          | 0.06<br>(0.10)    | 0.06<br>(0.08)               | 0.02<br>(0.12)           | ---                                |
| Income                        | -0.22<br>(0.24)   | -0.20<br>(0.17)              | -0.26<br>(0.25)          | ---                                |
| Income - Missing              | 0.07<br>(0.18)    | 0.04<br>(0.14)               | 0.25<br>(0.24)           | ---                                |
| Education                     | -0.53**<br>(0.23) | -0.41<br>(0.18)              | -0.74***<br>(0.25)       | ---                                |
| Constant                      | 1.17***<br>(0.29) | 0.98***<br>(0.24)            | 1.21***<br>(0.31)        | 1.40*<br>(0.82)                    |
| N                             | 128               | 128                          | 78                       | 61                                 |
| F-statistic                   | 2.46              | 2.11                         | 2.84                     | 1.05                               |

There are a number of approaches that can be taken to this branched question, which is based on three parts: (1) an introduction question that asks if people are interested, (2) a follow-up for those who are interested, and (3) a final follow-up to measure strength of positions. Table A12 presents four of these approaches. The first approach (Table 1) focuses on parts 2 and 3 of the branched question, but treats those who were uninterested (part 1) as missing, using multiple imputation to deal with these missings as well as any additional listwise deletion. This approach allows us to include those who said they were uninterested in the analysis. The second approach uses all three parts of the branched question by placing those who were uninterested at the mid-point, and uses multiple imputation to deal with listwise deletion. This second approach is somewhat weaker, as it places those people who stated they were uninterested in the first question at the mid-point, despite the fact that it is unclear that they would actually fall in that position. A third approach focuses only on parts 2 and 3 and includes only those who reported that they were interested, using multiple imputation to deal with any listwise deletion. A final approach still further limits the analysis, focusing only on part 2 of the branched question (without considering the strength of positions in part 3) and using no controls.

**Appendix 3.2, Continued**

*Table A13. Latinos (Foreign-Born), Death Penalty Results, 2008*

|                               | Table 2          | No MI             | No MI, No Controls | MI Alternative  |
|-------------------------------|------------------|-------------------|--------------------|-----------------|
| Neg. Stereotypes - Blacks     | 0.10<br>(0.18)   | 0.22<br>(0.20)    | 0.17<br>(0.20)     | 0.17<br>(0.19)  |
| Denial of Sympathy for Blacks | 0.15<br>(0.15)   | 0.14<br>(0.16)    | 0.21<br>(0.15)     | 0.15<br>(0.15)  |
| Party ID                      | 0.05<br>(0.13)   | 0.04<br>(0.14)    | ---                | 0.06<br>(0.13)  |
| Limited Government            | -0.15<br>(0.18)  | -0.05<br>(0.20)   | ---                | -0.10<br>(0.20) |
| Egalitarianism                | -0.50<br>(0.32)  | -0.75**<br>(0.32) | ---                | -0.54<br>(0.33) |
| Age                           | 0.34*<br>(0.18)  | 0.42**<br>(0.17)  | ---                | 0.35*<br>(0.18) |
| Male                          | 0.18**<br>(0.08) | 0.14*<br>(0.09)   | ---                | 0.16*<br>(0.09) |
| Income                        | -0.03<br>(0.20)  | 0.15<br>(0.20)    | ---                | 0.02<br>(0.21)  |
| Income - Missing              | 0.15<br>(0.16)   | 0.27<br>(0.18)    | ---                | 0.11<br>(0.15)  |
| Education                     | 0.20<br>(0.20)   | 0.15<br>(0.23)    | ---                | 0.18<br>(0.19)  |
| Constant                      | 0.39<br>(0.28)   | 0.39<br>(0.29)    | 0.33**<br>(0.15)   | 0.36<br>(0.29)  |
| N                             | 128              | 92                | 98                 | 118             |
| F-statistic                   | 2.07             | 3.80              | 1.20               | 2.12            |

**Appendix 3.2, Continued**

*Table A14. Latinos (Foreign-Born), Welfare Results, 2008*

|                               | Table 2           | No MI             | No MI, No Controls | MI Alternative    |
|-------------------------------|-------------------|-------------------|--------------------|-------------------|
| Neg. Stereotypes - Blacks     | -0.10<br>(0.10)   | -0.07<br>(0.11)   | -0.06<br>(0.11)    | -0.06<br>(0.10)   |
| Denial of Sympathy for Blacks | -0.07<br>(0.09)   | -0.10<br>(0.09)   | -0.07<br>(0.09)    | -0.09<br>(0.09)   |
| Party ID                      | 0.09<br>(0.07)    | 0.12*<br>(0.07)   | ---<br>---         | 0.09<br>(0.07)    |
| Limited Government            | -0.19*<br>(0.10)  | -0.21*<br>(0.11)  | ---<br>---         | -0.21*<br>(0.11)  |
| Egalitarianism                | 0.01<br>(0.20)    | -0.06<br>(0.21)   | ---<br>---         | -0.02<br>(0.20)   |
| Age                           | -0.05<br>(0.11)   | -0.06<br>(0.12)   | ---<br>---         | -0.06<br>(0.11)   |
| Male                          | -0.11*<br>(0.06)  | -0.10<br>(0.06)   | ---<br>---         | -0.10<br>(0.06)   |
| Income                        | 0.26**<br>(0.12)  | 0.28**<br>(0.12)  | ---<br>---         | 0.28**<br>(0.12)  |
| Income - Missing              | 0.04<br>(0.12)    | -0.08<br>(0.14)   | ---<br>---         | -0.06<br>(0.13)   |
| Education                     | -0.06<br>(0.12)   | -0.05<br>(0.13)   | ---<br>---         | -0.07<br>(0.13)   |
| Constant                      | 0.80***<br>(0.17) | 0.82***<br>(0.19) | 0.76***<br>(0.09)  | 0.82***<br>(0.18) |
| N                             | 128               | 100               | 107                | 118               |
| F-statistic                   | 2.27              | 2.85              | 0.39               | 2.55              |

### Appendix 3.2, Continued

*Table A15. Latinos (Foreign-Born), Vote Choice Results, 2008*

|                               | Table 2            | No MI              | No MI, No Controls | Candidate Preference | With Non-Voters    |
|-------------------------------|--------------------|--------------------|--------------------|----------------------|--------------------|
| Neg. Stereotypes - Blacks     | -2.70<br>(2.61)    | -2.52<br>(2.67)    | -2.39<br>(1.78)    | -0.62<br>(1.66)      | -0.31<br>(1.45)    |
| Denial of Sympathy for Blacks | -2.45**<br>(1.06)  | -1.77*<br>(0.95)   | -0.46<br>(0.91)    | -1.87*<br>(1.25)     | 0.05<br>(0.79)     |
| Party ID                      | -8.00***<br>(1.99) | -8.16***<br>(2.38) | ---<br>---         | -5.12***<br>(0.14)   | -5.64***<br>(1.49) |
| Limited Government            | -2.40<br>(1.62)    | -2.61*<br>(1.49)   | ---<br>---         | -3.17*<br>(1.65)     | -2.91**<br>(1.38)  |
| Egalitarianism                | 2.63<br>(2.45)     | 2.52<br>(1.99)     | ---<br>---         | 5.85<br>(3.61)       | 3.90*<br>(2.11)    |
| Age                           | 0.32<br>(1.68)     | -0.55<br>(1.98)    | ---<br>---         | -3.28<br>(2.09)      | -0.21<br>(1.61)    |
| Male                          | 0.33<br>(0.84)     | 0.27<br>(1.00)     | ---<br>---         | -0.66<br>(0.96)      | -0.35<br>(0.61)    |
| Income                        | 0.31<br>(1.71)     | 1.09<br>(2.53)     | ---<br>---         | -0.84<br>(1.65)      | 2.48*<br>(1.42)    |
| Income - Missing              | -5.01***<br>(1.69) | -4.94***<br>(1.54) | ---<br>---         | -2.54<br>(1.68)      | -1.27<br>(1.54)    |
| Education                     | -3.65<br>(2.53)    | -4.55<br>(3.47)    | ---<br>---         | -1.39<br>(2.16)      | 2.29<br>(1.72)     |
| Constant                      | 8.86*<br>(4.54)    | 9.08*<br>(5.28)    | 2.41*<br>(1.34)    | 5.17*<br>(2.72)      | -2.12<br>(1.70)    |
| N                             | 86                 | 65                 | 68                 | 114                  | 101                |
| F-statistic                   | 4.00               | 4.50               | 0.93               | 3.49                 | 2.68               |

In the particular case of the vote-choice variable, as a check we include a dependent variable that considers candidate preference rather than vote choice. This variable includes the preferences of those who did not vote. A second check – to ensure consistency with the 2012 data – is a measure that codes voting for Obama as 1 and people who voted for McCain, or did not vote at all as 0.

### Appendix 3.3. Whites (Non-Latino)

Table A16. Whites (Non-Latino), Affirmative Action Results, 2008

|                               | Table 1            | No MI              | No MI, No Controls | MI Alternative     |
|-------------------------------|--------------------|--------------------|--------------------|--------------------|
| Neg. Stereotypes - Blacks     | -0.03<br>(0.05)    | -0.03<br>(0.05)    | -0.04<br>(0.05)    | -0.02<br>(0.05)    |
| Denial of Sympathy for Blacks | -0.26***<br>(0.04) | -0.27***<br>(0.04) | -0.32***<br>(0.04) | -0.26***<br>(0.03) |
| Party ID                      | -0.12***<br>(0.03) | -0.11***<br>(0.03) | ---<br>---         | -0.12**<br>(0.03)  |
| Limited Government            | -0.06**<br>(0.02)  | -0.06**<br>(0.02)  | ---<br>---         | -0.05**<br>(0.03)  |
| Egalitarianism                | 0.13***<br>(0.05)  | 0.15**<br>(0.06)   | ---<br>---         | 0.16***<br>(0.05)  |
| Age                           | -0.07<br>(0.05)    | -0.04<br>(0.05)    | ---<br>---         | -0.03<br>(0.04)    |
| Male                          | 0.02<br>(0.02)     | 0.03<br>(0.02)     | ---<br>---         | 0.03*<br>(0.04)    |
| Income                        | -0.07*<br>(0.04)   | -0.08**<br>(0.04)  | ---<br>---         | -0.09**<br>(0.04)  |
| Income – Missing              | -0.03<br>(0.04)    | -0.06<br>(0.04)    | ---<br>---         | -0.06<br>(0.05)    |
| Education                     | -0.10<br>(0.08)    | -0.04<br>(0.09)    | ---<br>---         | -0.11<br>(0.07)    |
| Constant                      | 0.46***<br>(0.09)  | 0.40***<br>(0.09)  | 0.36***<br>(0.04)  | 0.42***<br>(0.08)  |
| N                             | 1110               | 894                | 952                | 942                |
| F-statistic                   | 15.13              | 14.24              | 31.20              | 19.04              |

**Appendix 3.3, Continued**

*Table A17. Whites (Non-Latino), Aid to Blacks Results, 2008*

|                               | Table 1            | No MI              | No MI, No Controls | MI Alternative     |
|-------------------------------|--------------------|--------------------|--------------------|--------------------|
| Neg. Stereotypes - Blacks     | -0.17***<br>(0.05) | -0.14***<br>(0.05) | -0.19***<br>(0.05) | -0.15***<br>(0.05) |
| Denial of Sympathy for Blacks | -0.26***<br>(0.04) | -0.26***<br>(0.04) | -0.37***<br>(0.04) | -0.23***<br>(0.04) |
| Party ID                      | -0.14***<br>(0.04) | -0.13***<br>(0.03) | ---<br>---         | -0.18***<br>(0.03) |
| Limited Government            | -0.06**<br>(0.03)  | -0.05*<br>(0.03)   | ---<br>---         | -0.03<br>(0.03)    |
| Egalitarianism                | 0.23***<br>(0.06)  | 0.26***<br>(0.06)  | ---<br>---         | 0.23***<br>(0.06)  |
| Age                           | -0.05<br>(0.04)    | -0.02<br>(0.05)    | ---<br>---         | -0.04<br>(0.04)    |
| Male                          | 0.03<br>(0.02)     | 0.04*<br>(0.02)    | ---<br>---         | 0.03<br>(0.02)     |
| Income                        | -0.07*<br>(0.04)   | -0.05<br>(0.04)    | ---<br>---         | -0.04<br>(0.04)    |
| Income – Missing              | 0.02<br>(0.05)     | 0.06<br>(0.05)     | ---<br>---         | 0.03<br>(0.04)     |
| Education                     | 0.18**<br>(0.09)   | 0.23**<br>(0.09)   | ---<br>---         | 0.15**<br>(0.07)   |
| Constant                      | 0.40***<br>(0.10)  | 0.29***<br>(0.10)  | 0.61***<br>(0.03)  | 0.38***<br>(0.08)  |
| N                             | 1110               | 797                | 846                | 942                |
| F-statistic                   | 24.32              | 24.22              | 62.44              | 23.64              |



### Appendix 3.3, Continued

Table A18. Whites (Non-Latino), Fair Jobs Results, 2008

|                               | Table 1            | Uninterested as<br>Mid-point | Uninterested<br>Excluded | Second<br>Question, no<br>controls |
|-------------------------------|--------------------|------------------------------|--------------------------|------------------------------------|
| Neg. Stereotypes – Blacks     | -0.38***<br>(0.08) | -0.22***<br>(0.05)           | -0.39***<br>(0.08)       | -2.68***<br>(0.61)                 |
| Denial of Sympathy for Blacks | -0.39***<br>(0.07) | -0.26***<br>(0.04)           | -0.43***<br>(0.07)       | -3.12***<br>(0.43)                 |
| Party ID                      | -0.10*<br>(0.06)   | -0.07**<br>(0.03)            | -0.08<br>(0.06)          | ---                                |
| Limited Government            | -0.18***<br>(0.05) | -0.10***<br>(0.03)           | -0.14***<br>(0.05)       | ---                                |
| Egalitarianism                | 0.46***<br>(0.11)  | 0.36***<br>(0.06)            | 0.51***<br>(0.10)        | ---                                |
| Age                           | -0.07<br>(0.07)    | -0.03<br>(0.04)              | -0.09<br>(0.08)          | ---                                |
| Male                          | 0.07*<br>(0.04)    | 0.04**<br>(0.02)             | 0.08**<br>(0.04)         | ---                                |
| Income                        | -0.01<br>(0.07)    | -0.03<br>(0.04)              | -0.02<br>(0.07)          | ---                                |
| Income – Missing              | 0.00<br>(0.08)     | -0.02<br>(0.05)              | -0.00<br>(0.10)          | ---                                |
| Education                     | -0.08<br>(0.16)    | 0.09<br>(0.08)               | 0.11<br>(0.14)           | ---                                |
| Constant                      | 0.80***<br>(0.15)  | 0.52***<br>(0.09)            | 0.59***<br>(0.16)        | 2.69***<br>(0.39)                  |
| N                             | 1110               | 1110                         | 651                      | 508                                |
| F-statistic                   | 26.34              | 26.96                        | 39.07                    | 36.33                              |

There are a number of approaches that can be taken to this branched question, which is based on three parts: (1) an introduction question that asks if people are interested, (2) a follow-up for those who are interested, and (3) a final follow-up to measure strength of positions. Table A18 presents four of these approaches. The first approach (Table 1) focuses on parts 2 and 3 of the branched question, but treats those who were uninterested (part 1) as missing, using multiple imputation to deal with these missings as well as any additional listwise deletion. This approach allows us to include those who said they were uninterested in the analysis. The second approach uses all three parts of the branched question by placing those who were uninterested at the mid-point, and uses multiple imputation to deal with listwise deletion. This second approach is somewhat weaker, as it places those people who stated they were uninterested in the first question at the mid-point, despite the fact that it is unclear that they would actually fall in that position. A third approach focuses only on parts 2 and 3 and includes only those who reported that they were interested, using multiple imputation to deal with any listwise deletion. A final approach still further limits the analysis, focusing only on part 2 of the branched question (without considering the strength of positions in part 3) and using no controls.

**Appendix 3.3, Continued**

*Table A19. Whites (Non-Latino), Death Penalty Results, 2008*

|                               | Table 2            | No MI              | No MI, No Controls | MI Alternative     |
|-------------------------------|--------------------|--------------------|--------------------|--------------------|
| Neg. Stereotypes - Blacks     | 0.12*<br>(0.07)    | 0.09<br>(0.07)     | 0.18**<br>(0.07)   | 0.08<br>(0.09)     |
| Denial of Sympathy for Blacks | 0.14***<br>(0.05)  | 0.15***<br>(0.05)  | 0.26***<br>(0.05)  | 0.14***<br>(0.05)  |
| Party ID                      | 0.14***<br>(0.04)  | 0.13***<br>(0.04)  | ---<br>---         | 0.14***<br>(0.04)  |
| Limited Government            | 0.02<br>(0.04)     | 0.00<br>(0.04)     | ---<br>---         | 0.01<br>(0.04)     |
| Egalitarianism                | -0.21***<br>(0.09) | -0.23**<br>(0.09)  | ---<br>---         | -0.24***<br>(0.09) |
| Age                           | 0.07<br>(0.06)     | 0.06<br>(0.06)     | ---<br>---         | 0.06<br>(0.06)     |
| Male                          | 0.04*<br>(0.03)    | 0.04<br>(0.03)     | ---<br>---         | 0.04<br>(0.03)     |
| Income                        | 0.13**<br>(0.06)   | 0.12**<br>(0.06)   | ---<br>---         | 0.14**<br>(0.06)   |
| Income – Missing              | 0.09<br>(0.06)     | 0.10<br>(0.07)     | ---<br>---         | 0.08<br>(0.07)     |
| Education                     | -0.64***<br>(0.10) | -0.62***<br>(0.11) | ---<br>---         | -0.64***<br>(0.11) |
| Constant                      | 1.03***<br>(0.12)  | 1.07***<br>(0.13)  | 0.49***<br>(0.05)  | 1.07***<br>(0.13)  |
| N                             | 1110               | 885                | 935                | 1036               |
| F-statistic                   | 12.38              | 10.48              | 18.92              | 14.55              |

**Appendix 3.3, Continued**

*Table A20. Whites (Non-Latino), Welfare Results, 2008*

|                               | Table 2            | No MI              | No MI, No Controls | MI Alternative     |
|-------------------------------|--------------------|--------------------|--------------------|--------------------|
| Neg. Stereotypes - Blacks     | 0.02<br>(0.05)     | 0.04<br>(0.06)     | 0.02<br>(0.06)     | 0.04<br>(0.06)     |
| Denial of Sympathy for Blacks | -0.02<br>(0.04)    | -0.01<br>(0.04)    | -0.05<br>(0.04)    | -0.02<br>(0.04)    |
| Party ID (Republican)         | 0.03<br>(0.03)     | 0.02<br>(0.03)     | ---                | 0.03<br>(0.03)     |
| Limited Government            | -0.09***<br>(0.03) | -0.09***<br>(0.03) | ---                | -0.09***<br>(0.03) |
| Egalitarianism                | 0.06<br>(0.07)     | 0.05<br>(0.07)     | ---                | 0.06<br>(0.07)     |
| Age                           | 0.07<br>(0.04)     | 0.08*<br>(0.05)    | ---                | 0.08*<br>(0.05)    |
| Male                          | -0.02<br>(0.02)    | -0.02<br>(0.02)    | ---                | -0.02<br>(0.02)    |
| Income                        | -0.08*<br>(0.04)   | -0.08*<br>(0.05)   | ---                | -0.08*<br>(0.04)   |
| Income – Missing              | -0.05<br>(0.05)    | 0.00<br>(0.06)     | ---                | -0.04<br>(0.05)    |
| Education                     | -0.13<br>(0.08)    | -0.15*<br>(0.09)   | ---                | -0.12<br>(0.08)    |
| Constant                      | 0.76***<br>(0.09)  | 0.76***<br>(0.10)  | 0.67***<br>(0.04)  | 0.74***<br>(0.10)  |
| N                             | 1110               | 898                | 955                | 1036               |
| F-statistic                   | 3.32               | 2.97               | 0.95               | 2.91               |

### Appendix 3.3, Continued

Table A21. Whites (Non-Latino), Vote Choice Results, 2008

|                               | Table 2            | No MI              | No MI, No Controls | Candidate Preference | With Non-Voters    |
|-------------------------------|--------------------|--------------------|--------------------|----------------------|--------------------|
| Neg. Stereotypes - Blacks     | -0.97<br>(0.68)    | -0.81<br>(0.75)    | -0.97**<br>(0.45)  | -0.85<br>(0.58)      | -0.73<br>(0.60)    |
| Denial of Sympathy for Blacks | -0.68<br>(0.47)    | -0.88*<br>(0.51)   | -1.74***<br>(0.33) | -1.10**<br>(0.43)    | -0.43<br>(0.41)    |
| Party ID                      | -5.26***<br>(0.47) | -5.38***<br>(0.51) | ---                | -5.24***<br>(0.43)   | -4.40***<br>(0.43) |
| Limited Government            | -0.99***<br>(0.33) | -0.99***<br>(0.36) | ---                | -0.89***<br>(0.29)   | -0.78**<br>(0.33)  |
| Egalitarianism                | 3.09***<br>(0.80)  | 2.83***<br>(0.88)  | ---                | 2.71***<br>(0.69)    | 2.31***<br>(0.72)  |
| Age                           | -1.06**<br>(0.50)  | -1.77***<br>(0.56) | ---                | -1.29***<br>(0.47)   | -0.09<br>(0.47)    |
| Male                          | 0.35<br>(0.25)     | 0.31<br>(0.27)     | ---                | 0.48**<br>(0.22)     | -0.07<br>(0.22)    |
| Income                        | 0.13<br>(0.54)     | 0.36<br>(0.60)     | ---                | -0.14<br>(0.50)      | 0.95**<br>(0.48)   |
| Income - Missing              | 0.58<br>(0.49)     | -0.17<br>(0.54)    | ---                | 0.27<br>(0.47)       | 0.62<br>(0.51)     |
| Education                     | -1.62<br>(1.13)    | -1.57<br>(1.29)    | ---                | -2.31**<br>(0.98)    | 1.82*<br>(0.99)    |
| Constant                      | 3.38***<br>(1.17)  | 3.76***<br>(1.28)  | 1.15***<br>(0.27)  | 4.60***<br>(1.02)    | -1.07<br>(0.93)    |
| N                             | 893                | 704                | 745                | 1040                 | 898                |
| F-statistic                   | 19.53              | 16.54              | 17.83              | 22.02                | 20.03              |

In the particular case of the vote-choice variable, as a check we include a dependent variable that considers candidate preference rather than vote choice. This variable includes the preferences of those who did not vote. A second check – to ensure consistency with the 2012 data – is a measure that codes voting for Obama as 1 and people who voted for McCain, or did not vote at all as 0.

## Appendix 4. Racial Resentment

Table A22. Latinos (US-Born), Racial Resentment as a Covariate, 2008

|                    | No Multiple Imputation |                    |                    |                   |                   |                    | Multiple Imputation |                    |                    |                   |                   |
|--------------------|------------------------|--------------------|--------------------|-------------------|-------------------|--------------------|---------------------|--------------------|--------------------|-------------------|-------------------|
|                    | Aff. Action            | Aid to Blacks      | Fair Jobs          | Death Penalty     | Welfare           | Vote Choice        | Aff. Action         | Aid to Blacks      | Fair Jobs          | Death Penalty     | Welfare           |
| Racial Resentment  | -0.58***<br>(0.09)     | -0.32***<br>(0.08) | -5.60***<br>(1.17) | 0.39***<br>(0.11) | -0.09<br>(0.10)   | -1.83<br>(1.25)    | -0.58***<br>(0.08)  | -0.42***<br>(0.08) | -0.77***<br>(0.11) | 0.41***<br>(0.11) | -0.08<br>(0.09)   |
| Party ID           | -0.16***<br>(0.06)     | -0.22***<br>(0.07) | -0.71<br>(0.77)    | 0.16**<br>(0.08)  | -0.06<br>(0.07)   | -4.08***<br>(0.84) | -0.16***<br>(0.06)  | -0.19***<br>(0.06) | -0.05<br>(0.10)    | 0.14*<br>(0.08)   | -0.04<br>(0.07)   |
| Limited Government | -0.00<br>(0.06)        | -0.07<br>(0.07)    | -0.41<br>(0.93)    | 0.04<br>(0.07)    | 0.00<br>(0.08)    | -1.09<br>(0.75)    | 0.00<br>(0.06)      | -0.08<br>(0.07)    | -0.15<br>(0.09)    | 0.05<br>(0.08)    | -0.00<br>(0.08)   |
| Egalitarianism     | 0.03<br>(0.12)         | 0.16<br>(0.12)     | 2.69<br>(1.66)     | -0.17<br>(0.14)   | 0.23*<br>(0.13)   | 1.86<br>(1.65)     | 0.01<br>(0.12)      | 0.07<br>(0.12)     | 0.37**<br>(0.17)   | -0.16<br>(0.14)   | 0.23*<br>(0.12)   |
| Age                | 0.03<br>(0.09)         | -0.03<br>(0.09)    | 0.93<br>(1.06)     | -0.09<br>(0.12)   | -0.10<br>(0.11)   | -1.95*<br>(1.08)   | 0.04<br>(0.10)      | 0.02<br>(0.08)     | 0.11<br>(0.12)     | -0.09<br>(0.11)   | -0.06<br>(0.10)   |
| Male               | -0.02<br>(0.04)        | -0.02<br>(0.04)    | 0.70<br>(0.48)     | 0.02<br>(0.05)    | 0.07<br>(0.04)    | -0.95**<br>(0.48)  | -0.01<br>(0.04)     | -0.03<br>(0.04)    | 0.05<br>(0.05)     | 0.01<br>(0.05)    | 0.05<br>(0.04)    |
| Income             | -0.18**<br>(0.08)      | -0.23***<br>(0.08) | 0.01<br>(1.23)     | 0.29***<br>(0.10) | -0.20**<br>(0.09) | 1.99<br>(1.21)     | -0.17<br>(0.15)     | 0.04<br>(0.16)     | -0.32<br>(0.22)    | 0.01<br>(0.18)    | 0.00<br>(0.17)    |
| Income - Missing   | 0.11<br>(0.17)         | -0.21<br>(0.15)    | -0.86<br>(0.84)    | -0.13<br>(0.17)   | -0.07<br>(0.10)   | ---<br>---         | -0.21**<br>(0.09)   | -0.24***<br>(0.08) | -0.12<br>(0.12)    | 0.28***<br>(0.10) | -0.19**<br>(0.09) |
| Education          | -0.19<br>(0.16)        | 0.02<br>(0.18)     | -2.61<br>(2.61)    | 0.01<br>(0.19)    | 0.05<br>(0.19)    | -1.17<br>(1.68)    | 0.04<br>(0.12)      | -0.20**<br>(0.10)  | -0.12<br>(0.11)    | -0.09<br>(0.14)   | -0.02<br>(0.08)   |
| Constant           | 0.85***<br>(0.16)      | 0.70***<br>(0.15)  | 3.97**<br>(1.75)   | 0.33*<br>(0.19)   | 0.59***<br>(0.16) | 4.09*<br>(2.14)    | 0.86***<br>(0.15)   | 0.79***<br>(0.13)  | 1.11***<br>(0.20)  | 0.34*<br>(0.18)   | 0.63***<br>(0.15) |
| N                  | 414                    | 331                | 224                | 396               | 418               | 287                | 451                 | 451                | 451                | 451               | 451               |
| F-statistic        | 9.99                   | 12.17              | 3.96               | 7.00              | 1.91              | 9.06               | 10.95               | 11.77              | 14.32              | 6.67              | 1.75              |

Models rely on OLS (affirmative action, aid to blacks, fair jobs, death penalty and welfare). Logit for the vote choice measure (1 if voted for Obama, 0 if voted for McCain, excludes non-voters). Fair jobs measure is based on the second part of the branched question. The approach is described in Appendix 3, Tables A6, A12 and A18.

**Appendix 4. Continued**

*Table A23. Latinos (Foreign-Born), Racial Resentment as a Covariate, 2008*

|                    | No Multiple Imputation |                    |                   |                   |                  |                    | Multiple Imputation |                    |                    |                  |                   |
|--------------------|------------------------|--------------------|-------------------|-------------------|------------------|--------------------|---------------------|--------------------|--------------------|------------------|-------------------|
|                    | Aff. Action            | Aid to Blacks      | Fair Jobs         | Death Penalty     | Welfare          | Vote Choice        | Aff. Action         | Aid to Blacks      | Fair Jobs          | Death Penalty    | Welfare           |
| Racial Resentment  | -0.57***<br>(0.19)     | -0.40**<br>(0.20)  | 0.39<br>(2.38)    | 0.27<br>(0.23)    | 0.38**<br>(0.15) | -4.25**<br>(1.98)  | -0.64***<br>(0.19)  | -0.52***<br>(0.20) | -0.29<br>(0.31)    | 0.16<br>(0.23)   | 0.40***<br>(0.14) |
| Party ID           | 0.21***<br>(0.08)      | -0.00<br>(0.12)    | -1.33<br>(0.89)   | -0.01<br>(0.14)   | 0.04<br>(0.08)   | -7.73***<br>(2.32) | -0.17**<br>(0.08)   | -0.04<br>(0.11)    | -0.12<br>(0.14)    | 0.08<br>(0.12)   | 0.01<br>(0.07)    |
| Limited Government | -0.02<br>(0.11)        | -0.36***<br>(0.12) | 0.13<br>(1.63)    | -0.06<br>(0.21)   | -0.20*<br>(0.11) | -2.92*<br>(1.63)   | -0.07<br>(0.11)     | -0.32***<br>(0.11) | -0.06<br>(0.21)    | -0.14<br>(0.18)  | -0.18*<br>(0.09)  |
| Egalitarianism     | -0.83***<br>(0.25)     | -0.10<br>(0.18)    | 3.24<br>(2.44)    | -0.71**<br>(0.32) | 0.12<br>(0.18)   | 3.12<br>(2.27)     | -0.72***<br>(0.25)  | -0.04<br>(0.19)    | 0.27<br>(0.36)     | -0.51*<br>(0.31) | 0.15<br>(0.17)    |
| Age                | -0.19<br>(0.18)        | -0.26*<br>(0.14)   | -1.73<br>(1.77)   | 0.42**<br>(0.17)  | -0.05<br>(0.10)  | 1.34<br>(1.71)     | -0.10<br>(0.17)     | -0.15<br>(0.13)    | -0.06<br>(0.22)    | 0.36**<br>(0.18) | -0.04<br>(0.10)   |
| Male               | -0.06<br>(0.07)        | -0.09<br>(0.07)    | -0.29<br>(0.70)   | 0.16*<br>(0.09)   | -0.08<br>(0.06)  | -0.14<br>(1.00)    | -0.05<br>(0.07)     | -0.05<br>(0.07)    | 0.02<br>(0.10)     | 0.20**<br>(0.09) | -0.08<br>(0.05)   |
| Income             | 0.07<br>(0.16)         | -0.38**<br>(0.18)  | -1.00<br>(1.61)   | 0.11<br>(0.20)    | 0.23*<br>(0.12)  | 0.37<br>(2.12)     | -0.39**<br>(0.17)   | -0.04<br>(0.16)    | -0.58***<br>(0.21) | 0.22<br>(0.20)   | -0.03<br>(0.11)   |
| Income - Missing   | 0.03<br>(0.19)         | -0.31***<br>(0.10) | ---<br>(1.92)     | 0.23<br>(0.17)    | 0.00<br>(0.12)   | -5.76***<br>(1.61) | 0.04<br>(0.15)      | -0.27*<br>(0.16)   | -0.19<br>(0.22)    | -0.04<br>(0.19)  | 0.24**<br>(0.12)  |
| Education          | -0.35*<br>(0.18)       | -0.02<br>(0.18)    | -4.66**<br>(1.92) | 0.12<br>(0.22)    | -0.01<br>(0.11)  | -3.06<br>(3.46)    | -0.00<br>(0.15)     | -0.21*<br>(0.12)   | 0.13<br>(0.20)     | 0.07<br>(0.16)   | 0.12<br>(0.11)    |
| Constant           | 1.54***<br>(0.25)      | 1.24***<br>(0.23)  | 3.13<br>(2.51)    | 0.47<br>(0.29)    | 0.41**<br>(0.17) | 7.74***<br>(3.71)  | 1.50***<br>(0.24)   | 1.15***<br>(0.21)  | 1.16***<br>(0.35)  | 0.38<br>(0.28)   | 0.40**<br>(0.16)  |
| N                  | 112                    | 96                 | 69                | 106               | 114              | 78                 | 128                 | 128                | 128                | 128              | 128               |
| F-stat             | 3.60                   | 3.46               | 1.24              | 2.61              | 3.56             | 3.54               | 128                 | 128                | 128                | 128              | 128               |

Models rely on OLS (affirmative action, aid to blacks, fair jobs, death penalty and welfare). Logit for the vote choice measure (1 if voted for Obama, 0 if voted for McCain, excludes non-voters). Fair jobs measure is based on the second part of the branched question. The approach is described in Appendix 3, Tables A6, A12 and A18.

**Appendix 4, Continued**

*Table A24. White (Non-Latino), Racial Resentment as a Covariate, 2008*

|                    | No Multiple Imputation |                    |                    |                   |                    |                    | Multiple Imputation |                    |                    |                    |                    |
|--------------------|------------------------|--------------------|--------------------|-------------------|--------------------|--------------------|---------------------|--------------------|--------------------|--------------------|--------------------|
|                    | Aff. Action            | Aid to Blacks      | Fair Jobs          | Death Penalty     | Welfare            | Vote Obama         | Aff. Action         | Aid to Blacks      | Fair Jobs          | Death Penalty      | Welfare            |
| Racial Resentment  | -0.44***<br>(0.04)     | -0.55***<br>(0.04) | -3.88***<br>(0.66) | 0.51***<br>(0.06) | 0.03<br>(0.05)     | -3.60***<br>(0.70) | -0.43***<br>(0.04)  | -0.55***<br>(0.04) | -0.66***<br>(0.08) | 0.49***<br>(0.06)  | 0.04<br>(0.05)     |
| Party ID           | -0.08***<br>(0.03)     | -0.07**<br>(0.03)  | -0.11<br>(0.42)    | 0.08*<br>(0.04)   | 0.03<br>(0.03)     | -5.38***<br>(0.52) | -0.09***<br>(0.03)  | -0.08**<br>(0.03)  | -0.06<br>(0.05)    | 0.09**<br>(0.04)   | 0.02<br>(0.03)     |
| Limited Government | -0.05**<br>(0.02)      | -0.04<br>(0.02)    | -0.63*<br>(0.34)   | 0.01<br>(0.04)    | -0.09***<br>(0.03) | -1.09***<br>(0.36) | -0.05*<br>(0.02)    | -0.05*<br>(0.03)   | -0.14***<br>(0.05) | 0.01<br>(0.04)     | -0.09***<br>(0.03) |
| Egalitarianism     | 0.05<br>(0.05)         | 0.13**<br>(0.06)   | 3.15***<br>(0.80)  | -0.08<br>(0.09)   | 0.08<br>(0.07)     | 2.05**<br>(0.90)   | 0.06<br>(0.05)      | 0.12**<br>(0.06)   | 0.38***<br>(0.11)  | -0.08<br>(0.08)    | 0.09<br>(0.07)     |
| Age                | -0.01<br>(0.05)        | 0.00<br>(0.04)     | 0.06<br>(0.58)     | 0.06<br>(0.06)    | 0.09**<br>(0.04)   | -1.59***<br>(0.56) | -0.02<br>(0.04)     | -0.00<br>(0.04)    | 0.02<br>(0.07)     | 0.05<br>(0.05)     | 0.07*<br>(0.04)    |
| Male               | 0.00<br>(0.02)         | 0.00<br>(0.02)     | 0.23<br>(0.25)     | 0.07**<br>(0.03)  | -0.02<br>(0.02)    | 0.15<br>(0.28)     | 0.00<br>(0.02)      | -0.01<br>(0.02)    | 0.03<br>(0.03)     | 0.07***<br>(0.03)  | -0.02<br>(0.02)    |
| Income             | -0.06<br>(0.04)        | -0.04<br>(0.03)    | 0.49<br>(0.52)     | 0.10*<br>(0.06)   | -0.08*<br>(0.04)   | 0.43<br>(0.59)     | -0.22***<br>(0.08)  | -0.01<br>(0.08)    | -0.25*<br>(0.14)   | -0.45***<br>(0.11) | -0.11<br>(0.08)    |
| Income - Missing   | -0.04<br>(0.04)        | 0.07<br>(0.05)     | 0.51<br>(0.78)     | 0.07<br>(0.06)    | -0.04<br>(0.05)    | -0.08<br>(0.55)    | -0.06*<br>(0.04)    | -0.05<br>(0.04)    | 0.00<br>(0.07)     | 0.09*<br>(0.06)    | -0.09**<br>(0.04)  |
| Education          | -0.19**<br>(0.09)      | 0.02<br>(0.08)     | -1.26<br>(1.04)    | 0.47***<br>(0.11) | -0.11<br>(0.08)    | -3.04**<br>(1.29)  | -0.02<br>(0.04)     | 0.04<br>(0.05)     | 0.01<br>(0.07)     | 0.06<br>(0.06)     | -0.05<br>(0.05)    |
| Constant           | 0.66***<br>(0.08)      | 0.64***<br>(0.10)  | 1.40<br>(1.26)     | 0.67***<br>(0.13) | 0.70***<br>(0.10)  | 6.82***<br>(1.58)  | 0.69***<br>(0.08)   | 0.71***<br>(0.10)  | 0.95***<br>(0.17)  | 0.66***<br>(0.13)  | 0.70***<br>(0.09)  |
| N                  | 1016                   | 914                | 589                | 1000              | 1018               | 823                | 1,110               | 1,110              | 1,110              | 1,110              | 1,110              |
| F-stat             | 22.43                  | 56.18              | 9.36               | 25.94             | 3.41               | 21.96              | 23.75               | 51.54              | 32.86              | 24.34              | 3.89               |

Models rely on OLS (affirmative action, aid to blacks, fair jobs, death penalty and welfare). Logit for the vote choice measure (1 if voted for Obama, 0 if voted for McCain, excludes non-voters). Fair jobs measure is based on the second part of the branched question. The approach is described in Appendix 3, Tables A6, A12 and A18.

**Appendix 4, Continued**

*Table A25. Latino (US-Born) Racial Resentment as a Covariate, 2012*

|                    | No Multiple Imputation |                    |                    |                   |                    |                    | Multiple Imputation |                    |                    |                  |
|--------------------|------------------------|--------------------|--------------------|-------------------|--------------------|--------------------|---------------------|--------------------|--------------------|------------------|
|                    | Aff Action             | Aid to Blacks      | Fair Jobs          | Death Penalty     | Welfare            | Vote Choice        | Aff. Action         | Aid to Blacks      | Fair Jobs          | Death Penalty    |
| Racial Resentment  | -0.38***<br>(0.14)     | -0.53***<br>(0.08) | -0.59***<br>(0.12) | 0.24*<br>(0.14)   | -0.01<br>(0.38)    | -1.66<br>(1.78)    | -0.41***<br>(0.13)  | -0.55***<br>(0.08) | -0.61***<br>(0.12) | 0.28**<br>(0.14) |
| Party ID           | -0.09<br>(0.08)        | -0.05<br>(0.06)    | -0.18<br>(0.11)    | 0.15*<br>(0.09)   | -1.17***<br>(0.32) | -7.79***<br>(1.49) | -0.08<br>(0.08)     | -0.05<br>(0.06)    | -0.14<br>(0.11)    | 0.09<br>(0.09)   |
| Limited Government | -0.08<br>(0.06)        | -0.02<br>(0.05)    | -0.10<br>(0.12)    | -0.07<br>(0.09)   | -0.11<br>(0.32)    | -0.77<br>(0.73)    | -0.05<br>(0.07)     | -0.01<br>(0.06)    | -0.10<br>(0.11)    | -0.08<br>(0.10)  |
| Egalitarianism     | 0.15<br>(0.15)         | 0.39***<br>(0.13)  | 0.83***<br>(0.16)  | -0.17<br>(0.17)   | 0.41<br>(0.51)     | -0.07<br>(1.78)    | 0.11<br>(0.16)      | 0.34***<br>(0.12)  | 0.75***<br>(0.17)  | -0.15<br>(0.19)  |
| Age                | 0.06<br>(0.13)         | -0.19**<br>(0.08)  | -0.03<br>(0.12)    | 0.07<br>(0.12)    | -0.64*<br>(0.39)   | 0.38<br>(1.19)     | -0.00<br>(0.12)     | -0.11<br>(0.08)    | -0.07<br>(0.11)    | 0.13<br>(0.12)   |
| Male               | 0.02<br>(0.06)         | -0.04<br>(0.04)    | 0.02<br>(0.06)     | 0.03<br>(0.06)    | -0.34**<br>(0.17)  | -0.12<br>(0.81)    | 0.01<br>(0.06)      | -0.03<br>(0.04)    | 0.02<br>(0.06)     | 0.04<br>(0.06)   |
| Income             | 0.05<br>(0.13)         | -0.07<br>(0.09)    | -0.12<br>(0.13)    | 0.18<br>(0.13)    | -1.33***<br>(0.41) | -1.37<br>(1.15)    | -0.15<br>(0.10)     | -0.04<br>(0.07)    | -0.08<br>(0.11)    | -0.04<br>(0.11)  |
| Income - Missing   | 0.09<br>(0.08)         | -0.06<br>(0.06)    | 0.09<br>(0.08)     | -0.01<br>(0.10)   | -0.16<br>(0.24)    | -2.64***<br>(1.00) | 0.02<br>(0.13)      | -0.08<br>(0.08)    | -0.10<br>(0.13)    | 0.16<br>(0.12)   |
| Education          | -0.14<br>(0.11)        | -0.06<br>(0.07)    | -0.11<br>(0.12)    | -0.05<br>(0.13)   | -0.12<br>(0.41)    | -0.74<br>(1.32)    | 0.05<br>(0.10)      | -0.07<br>(0.05)    | 0.06<br>(0.09)     | 0.04<br>(0.10)   |
| Constant cut1      | ---                    | ---                | ---                | ---               | -1.44**<br>(0.59)  | ---                | ---                 | ---                | ---                | ---              |
| Constant cut2      | ---                    | ---                | ---                | ---               | -0.24<br>(0.57)    | ---                | ---                 | ---                | ---                | ---              |
| Constant           | 0.39**<br>(0.17)       | 0.67***<br>(0.12)  | 0.50***<br>(0.17)  | 0.53***<br>(0.19) | ---                | 7.63***<br>(2.16)  | 0.49***<br>(0.18)   | 0.67***<br>(0.12)  | 0.57***<br>(0.17)  | 0.49**<br>(0.20) |
| N                  | 292                    | 252                | 282                | 294               | 305                | 174                | 346                 | 346                | 346                | 346              |
| F-Statistic        | 3.33                   | 15.92              | 25.51              | 1.57              | 4.86               | 5.52               | 2.13                | 12.52              | 18.83              | 1.30             |

Models rely on OLS (affirmative action, aid to blacks, fair jobs and death penalty). Ordered probit for welfare and logit for the vote choice measure (includes non-voters). Fair jobs measure is based on the second part of the branched question. The approach is described in Appendix 3, Tables A6, A12 and A18.



**Appendix 4, Continued**

*Table A26. Latino (Foreign-Born) Racial Resentment as a Covariate, 2012*

|                    | No Multiple Imputation |                    |                    |                  |                    |                    | Multiple Imputation |                    |                    |                 |
|--------------------|------------------------|--------------------|--------------------|------------------|--------------------|--------------------|---------------------|--------------------|--------------------|-----------------|
|                    | Aff. Action            | Aid to Blacks      | Fair Jobs          | Death Penalty    | Welfare            | Vote Choice        | Aff. Action         | Aid to Blacks      | Fair Jobs          | Death Penalty   |
| Racial Resentment  | -0.85***<br>(0.20)     | -0.69***<br>(0.17) | -1.01***<br>(0.22) | 0.21<br>(0.22)   | -1.45*<br>(0.75)   | 5.06<br>(3.11)     | -0.86***<br>(0.18)  | -0.63***<br>(0.15) | -0.88***<br>(0.22) | 0.36*<br>(0.22) |
| Party ID           | -0.22<br>(0.17)        | -0.43***<br>(0.13) | 0.02<br>(0.16)     | 0.34**<br>(0.15) | -0.97**<br>(0.47)  | -8.23***<br>(2.71) | -0.17<br>(0.17)     | -0.28*<br>(0.15)   | 0.04<br>(0.15)     | 0.19<br>(0.18)  |
| Limited Government | -0.08<br>(0.12)        | 0.02<br>(0.12)     | -0.26*<br>(0.15)   | -0.19<br>(0.17)  | -0.97*<br>(0.54)   | 0.54<br>(2.03)     | -0.12<br>(0.12)     | -0.08<br>(0.12)    | -0.28**<br>(0.14)  | -0.11<br>(0.17) |
| Egalitarianism     | -0.43**<br>(0.17)      | -0.10<br>(0.22)    | -0.27<br>(0.32)    | 0.19<br>(0.33)   | -1.78<br>(1.15)    | 4.13*<br>(2.39)    | -0.39*<br>(0.21)    | -0.06<br>(0.22)    | -0.28<br>(0.31)    | 0.04<br>(0.34)  |
| Age                | 0.00<br>(0.14)         | 0.00<br>(0.20)     | 0.20<br>(0.16)     | 0.13<br>(0.20)   | -0.22<br>(0.52)    | -3.86<br>(2.60)    | 0.01<br>(0.15)      | 0.04<br>(0.17)     | 0.15<br>(0.17)     | 0.01<br>(0.20)  |
| Male               | -0.10<br>(0.08)        | -0.06<br>(0.08)    | 0.08<br>(0.09)     | -0.20*<br>(0.10) | -0.02<br>(0.31)    | 2.76*<br>(1.44)    | -0.10<br>(0.08)     | -0.10<br>(0.07)    | 0.12<br>(0.08)     | -0.07<br>(0.11) |
| Income             | 0.22*<br>(0.13)        | -0.19<br>(0.17)    | -0.40**<br>(0.15)  | 0.32<br>(0.23)   | -1.15*<br>(0.66)   | 2.02<br>(2.45)     | -0.21*<br>(0.12)    | 0.09<br>(0.15)     | 0.28*<br>(0.16)    | -0.18<br>(0.21) |
| Income - Missing   | -0.13<br>(0.11)        | 0.09<br>(0.16)     | -0.09<br>(0.16)    | -0.11<br>(0.16)  | -0.03<br>(0.39)    | ---<br>---         | 0.05<br>(0.14)      | -0.15<br>(0.16)    | -0.41***<br>(0.15) | 0.31<br>(0.22)  |
| Education          | -0.30***<br>(0.11)     | 0.05<br>(0.16)     | 0.35**<br>(0.16)   | -0.16<br>(0.23)  | -0.92<br>(0.68)    | -3.03*<br>(1.57)   | -0.22**<br>(0.10)   | 0.06<br>(0.13)     | -0.16<br>(0.15)    | -0.03<br>(0.15) |
| Constant cut1      | ---                    | ---                | ---                | ---              | -3.97***<br>(1.22) | ---                | ---                 | ---                | ---                | ---             |
| Constant cut2      | ---                    | ---                | ---                | ---              | -2.72**<br>(1.22)  | ---                | ---                 | ---                | ---                | ---             |
| Constant           | 1.25***<br>(0.26)      | 1.14***<br>(0.33)  | 1.35***<br>(0.30)  | 0.26<br>(0.36)   | ---                | -0.80<br>(3.21)    | 1.30***<br>(0.25)   | 1.03***<br>(0.27)  | 1.31***<br>(0.30)  | 0.28<br>(0.36)  |
| N                  | 95                     | 91                 | 102                | 100              | 102                | 58                 | 126                 | 126                | 126                | 126             |
| F- Statistic       | 5.24                   | 10.00              | 7.67               | 2.14             | 4.34               | 2.10               | 4.17                | 6.12               | 6.82               | 0.89            |

**Appendix 4, Continued**

*Table A27. Whites (Non-Latino), Racial Resentment as a Covariate, 2012*

|                    | No Multiple Imputation |                    |                    |                    |                    |                    | Multiple Imputation |                    |                    |                    |
|--------------------|------------------------|--------------------|--------------------|--------------------|--------------------|--------------------|---------------------|--------------------|--------------------|--------------------|
|                    | Aff. Action            | Aid to Blacks      | Fair Jobs          | Death Penalty      | Welfare            | Vote Choice        | Aff. Action         | Aid to Blacks      | Fair Jobs          | Death Penalty      |
| Racial Resentment  | -0.49***<br>(0.05)     | -0.47***<br>(0.04) | -0.66***<br>(0.07) | 0.46***<br>(0.07)  | -0.75***<br>(0.24) | -2.08**<br>(0.84)  | -0.49***<br>(0.05)  | -0.48***<br>(0.04) | -0.67***<br>(0.07) | 0.45***<br>(0.07)  |
| Party ID           | -0.01<br>(0.05)        | -0.09***<br>(0.03) | -0.00<br>(0.06)    | 0.12**<br>(0.05)   | -0.42**<br>(0.18)  | -5.53***<br>(0.67) | -0.02<br>(0.04)     | -0.08**<br>(0.04)  | 0.00<br>(0.05)     | 0.12**<br>(0.05)   |
| Limited Government | -0.07*<br>(0.04)       | -0.06*<br>(0.03)   | -0.24***<br>(0.05) | -0.01<br>(0.05)    | -0.60***<br>(0.15) | -1.20**<br>(0.50)  | -0.07**<br>(0.03)   | -0.07*<br>(0.03)   | -0.25***<br>(0.05) | 0.00<br>(0.04)     |
| Egalitarianism     | 0.05<br>(0.07)         | 0.10*<br>(0.06)    | 0.46***<br>(0.09)  | -0.03<br>(0.09)    | 1.06***<br>(0.31)  | 1.56<br>(1.00)     | 0.04<br>(0.06)      | 0.09<br>(0.06)     | 0.43***<br>(0.09)  | -0.02<br>(0.09)    |
| Age                | -0.00<br>(0.04)        | 0.00<br>(0.04)     | -0.04<br>(0.05)    | -0.03<br>(0.05)    | 0.37**<br>(0.17)   | -0.10<br>(0.53)    | -0.00<br>(0.04)     | -0.02<br>(0.03)    | -0.02<br>(0.05)    | -0.04<br>(0.05)    |
| Male               | 0.02<br>(0.02)         | 0.02<br>(0.02)     | 0.04<br>(0.03)     | 0.05*<br>(0.03)    | -0.18*<br>(0.10)   | 0.38<br>(0.31)     | 0.02<br>(0.02)      | 0.02<br>(0.02)     | 0.04<br>(0.03)     | 0.04<br>(0.03)     |
| Income             | -0.09*<br>(0.05)       | -0.08**<br>(0.04)  | 0.00<br>(0.06)     | 0.04<br>(0.06)     | -0.67***<br>(0.19) | -0.73<br>(0.69)    | -0.11***<br>(0.04)  | -0.00<br>(0.03)    | 0.02<br>(0.05)     | -0.23***<br>(0.05) |
| Income - Missing   | -0.06*<br>(0.04)       | -0.01<br>(0.04)    | -0.06<br>(0.05)    | -0.00<br>(0.05)    | -0.19<br>(0.18)    | 0.11<br>(0.61)     | -0.10**<br>(0.05)   | -0.10**<br>(0.04)  | -0.01<br>(0.06)    | 0.04<br>(0.06)     |
| Education          | -0.11***<br>(0.04)     | 0.02<br>(0.04)     | 0.02<br>(0.05)     | -0.24***<br>(0.06) | 0.10<br>(0.18)     | 0.85<br>(0.62)     | -0.06*<br>(0.04)    | -0.02<br>(0.04)    | -0.04<br>(0.05)    | 0.01<br>(0.04)     |
| Constant cut1      | ---                    | ---                | ---                | ---                | -0.65*<br>(0.34)   | ---                | ---                 | ---                | ---                | ---                |
| Constant cut2      | ---                    | ---                | ---                | ---                | 0.89***<br>(0.33)  | ---                | ---                 | ---                | ---                | ---                |
| Constant           | 0.58***<br>(0.09)      | 0.65***<br>(0.07)  | 0.73***<br>(0.10)  | 0.48***<br>(0.11)  | ---                | 3.16**<br>(1.31)   | 0.60***<br>(0.08)   | 0.70***<br>(0.07)  | 0.76***<br>(0.10)  | 0.47***<br>(0.10)  |
| Observations       | 796                    | 709                | 766                | 787                | 806                | 592                | 918                 | 918                | 918                | 918                |
| R-squared          | 18.22                  | 40.11              | 91.30              | 17.47              | 18.72              | 18.29              | 20.07               | 40.13              | 85.88              | 18.67              |

## Appendix 5. 2012 Results

In this appendix we present the full coefficient results from Table 3 of the manuscript, which shows the patterns for the 2012 ANES. The results rely on multiple imputation to deal with listwise deletion in all cases except welfare and vote choice where the categorical structure of the variable makes relying on these approaches more difficult.

Table A28. Full Coefficient Results for Table 3, US-Born Latinos

|                    | Aff. Action        | Aid to Blacks      | Fair Jobs          | Death Penalty    | Welfare            | Vote Choice        |
|--------------------|--------------------|--------------------|--------------------|------------------|--------------------|--------------------|
| Neg. Stereotypes   | -0.03<br>(0.14)    | -0.12<br>(0.13)    | -0.39***<br>(0.14) | 0.03<br>(0.15)   | -1.07**<br>(0.43)  | 0.13<br>(0.63)     |
| Denial of Sympathy | -0.45***<br>(0.10) | -0.20**<br>(0.09)  | -0.27**<br>(0.11)  | 0.26**<br>(0.12) | -0.47<br>(0.34)    | -0.97<br>(0.61)    |
| Party ID           | -0.10<br>(0.07)    | -0.09<br>(0.07)    | -0.17<br>(0.11)    | 0.11<br>(0.10)   | -1.16***<br>(0.33) | -3.27***<br>(0.40) |
| Limited Gov't      | -0.07<br>(0.07)    | -0.05<br>(0.06)    | -0.16<br>(0.11)    | -0.06<br>(0.10)  | -0.04<br>(0.30)    | -0.91**<br>(0.38)  |
| Egalitarianism     | 0.09<br>(0.16)     | 0.47***<br>(0.14)  | 0.80***<br>(0.17)  | -0.14<br>(0.19)  | -0.06<br>(0.52)    | 1.52*<br>(0.82)    |
| Age                | -0.12<br>(0.11)    | -0.24***<br>(0.10) | -0.17<br>(0.13)    | 0.21*<br>(0.12)  | -0.72*<br>(0.41)   | 0.08<br>(0.45)     |
| Male               | 0.04<br>(0.05)     | -0.00<br>(0.04)    | 0.05<br>(0.06)     | 0.01<br>(0.06)   | -0.36**<br>(0.17)  | -0.38<br>(0.24)    |
| Income             | 0.04<br>(0.11)     | -0.10<br>(0.10)    | -0.03<br>(0.12)    | 0.16<br>(0.12)   | -1.31***<br>(0.40) | -0.33<br>(0.51)    |
| Income - Missing   | 0.06<br>(0.08)     | -0.06<br>(0.06)    | 0.11<br>(0.10)     | 0.02<br>(0.09)   | -0.17<br>(0.24)    | -0.07<br>(0.44)    |
| Education          | -0.09<br>(0.10)    | -0.01<br>(0.08)    | -0.04<br>(0.12)    | -0.08<br>(0.11)  | -0.01<br>(0.41)    | -0.04<br>(0.46)    |
| Constant           | 0.56***<br>(0.17)  | 0.51***<br>(0.16)  | 0.49**<br>(0.19)   | 0.46**<br>(0.20) | ---<br>---         | 2.43***<br>(0.84)  |
| Cut Point 1        | ---                | ---                | ---                | ---              | -2.54***<br>(0.63) | ---                |
| Cut Point 2        | ---                | ---                | ---                | ---              | -1.30**<br>(0.59)  | ---                |
| N                  | 346                | 346                | 346                | 346              | 310                | 413                |
| F-statistic        | 4.36               | 4.45               | 13.56              | 1.80             | 5.27               | 13.99              |

**Appendix 5, Continued**

*Table A29. Full Coefficient Results for Table 3, Foreign-Born Latinos*

|                               | Aff. Action       | Aid to Blacks     | Fair Jobs          | Death Penalty    | Welfare           | Vote Choice        |
|-------------------------------|-------------------|-------------------|--------------------|------------------|-------------------|--------------------|
| Neg. Stereotypes – Blacks     | -0.14<br>(0.21)   | -0.30*<br>(0.17)  | -0.43**<br>(0.20)  | 0.46**<br>(0.20) | 0.85<br>(0.80)    | 1.45<br>(1.09)     |
| Denial of Sympathy for Blacks | -0.37**<br>(0.16) | -0.39<br>(0.15)   | -0.40***<br>(0.14) | -0.14<br>(0.18)  | -2.05**<br>(0.79) | -0.42<br>(0.84)    |
| Party ID (Republican)         | -0.11<br>(0.14)   | -0.22*<br>(0.12)  | 0.14<br>(0.14)     | 0.14<br>(0.18)   | -0.70<br>(0.48)   | -4.14***<br>(0.79) |
| Limited Government            | -0.07<br>(0.13)   | -0.05<br>(0.12)   | -0.27*<br>(0.14)   | -0.03<br>(0.18)  | -0.94*<br>(0.54)  | -0.80*<br>(0.48)   |
| Egalitarianism                | -0.24<br>(0.25)   | 0.07<br>(0.25)    | -0.16<br>(0.35)    | 0.13<br>(0.35)   | -0.35<br>(1.07)   | 0.94<br>(0.98)     |
| Age                           | 0.01<br>(0.18)    | 0.07<br>(0.17)    | 0.12<br>(0.18)     | -0.03<br>(0.20)  | -0.22<br>(0.56)   | -2.06***<br>(0.57) |
| Male                          | 0.05<br>(0.07)    | -0.00<br>(0.07)   | 0.26**<br>(0.08)   | -0.10<br>(0.10)  | 0.50<br>(0.30)    | 1.16***<br>(0.38)  |
| Income                        | 0.13<br>(0.20)    | -0.07<br>(0.19)   | -0.30<br>(0.20)    | 0.30<br>(0.22)   | -0.41<br>(0.67)   | -0.83<br>(0.62)    |
| Income - Missing              | -0.17<br>(0.11)   | 0.10<br>(0.13)    | -0.13<br>(0.14)    | 0.00<br>(0.15)   | -0.04<br>(0.45)   | ---<br>---         |
| Education                     | -0.33*<br>(0.17)  | -0.00<br>(0.15)   | 0.11<br>(0.18)     | -0.14<br>(0.22)  | -1.77**<br>(0.69) | -0.14<br>(0.71)    |
| Constant                      | 0.85***<br>(0.29) | 0.85***<br>(0.30) | 1.06***<br>(0.31)  | 0.33<br>(0.34)   | ---<br>---        | 2.77**<br>(1.37)   |
| Cut Point 1                   | ---               | ---               | ---                | ---              | -3.00**<br>(1.17) | ---                |
| Cut Point 2                   | ---               | ---               | ---                | ---              | -1.50<br>(1.12)   | ---                |
| N                             | 125               | 126               | 125                | 125              | 106               | 201                |
| F-statistic                   | 1.72              | 5.58              | 6.92               | 1.17             | 3.44              | 6.82               |

**Appendix 5, Continued**

*Table A30. Full Coefficient Results for Table 3, Whites (Non-Latino)*

|                               | Aff. Action        | Aid to Blacks      | Fair Jobs          | Death Penalty      | Welfare            | Vote Choice        |
|-------------------------------|--------------------|--------------------|--------------------|--------------------|--------------------|--------------------|
| Neg. Stereotypes - Blacks     | -0.14**<br>(0.06)  | -0.11**<br>(0.05)  | -0.14*<br>(0.08)   | 0.20***<br>(0.07)  | -0.40<br>(0.28)    | -0.58**<br>(0.25)  |
| Denial of Sympathy for Blacks | -0.22***<br>(0.05) | -0.21***<br>(0.05) | -0.30***<br>(0.07) | 0.15**<br>(0.06)   | -0.11<br>(0.23)    | 0.07<br>(0.25)     |
| Party ID (Republican)         | -0.09**<br>(0.04)  | -0.16***<br>(0.04) | -0.09<br>(0.06)    | 0.18***<br>(0.05)  | -0.51***<br>(0.17) | -3.13***<br>(0.18) |
| Limited Government            | -0.09**<br>(0.04)  | -0.08**<br>(0.03)  | -0.28***<br>(0.05) | 0.02<br>(0.05)     | -0.62***<br>(0.15) | -0.82***<br>(0.14) |
| Egalitarianism                | 0.16**<br>(0.06)   | 0.23***<br>(0.06)  | 0.63***<br>(0.09)  | -0.14<br>(0.09)    | 1.21***<br>(0.30)  | 1.50***<br>(0.32)  |
| Age                           | -0.04<br>(0.04)    | -0.07**<br>(0.04)  | -0.10*<br>(0.05)   | -0.00<br>(0.05)    | 0.31*<br>(0.18)    | -0.05<br>(0.18)    |
| Male                          | 0.03<br>(0.02)     | 0.03*<br>(0.02)    | 0.07**<br>(0.03)   | 0.02<br>(0.03)     | -0.15<br>(0.10)    | -0.00<br>(0.09)    |
| Income                        | -0.06<br>(0.05)    | -0.07*<br>(0.04)   | 0.04<br>(0.06)     | 0.01<br>(0.06)     | -0.59***<br>(0.19) | -0.13<br>(0.19)    |
| Income - Missing              | -0.07*<br>(0.04)   | -0.03<br>(0.04)    | -0.06<br>(0.05)    | 0.01<br>(0.05)     | -0.13<br>(0.19)    | 0.35<br>(0.24)     |
| Education                     | -0.04<br>(0.04)    | 0.06<br>(0.04)     | 0.10<br>(0.05)     | -0.28***<br>(0.10) | 0.18<br>(0.18)     | 0.58***<br>(0.18)  |
| Constant                      | 0.45***<br>(0.08)  | 0.54***<br>(0.08)  | 0.52***<br>(0.10)  | 0.62***<br>(0.06)  | ---                | 0.96**<br>(0.39)   |
| Cut Point 1                   | ---                | ---                | ---                | ---                | -0.34<br>(0.35)    | ---                |
| Cut Point 2                   | ---                | ---                | ---                | ---                | 1.18***<br>(0.34)  | ---                |
| N                             | 917                | 918                | 917                | 917                | 819                | 2,591              |
| F-statistic                   | 11.76              | 19.55              | 50.59              | 12.87              | 14.67              | 67.71              |

## **Appendix 6. Changes in Specification, 2012**

Much as we did with the 2008 data, we present a set of analyses that shift the specification of our models in several different ways. The results below show our results without multiple imputation (“No MI”) and without no control variables, (“No MI, No Controls”). Again across all specifications our results point to the same conclusions.

We follow the same imputation approaches as described in Appendix 3. The following percentages of cases would be lost due to listwise deletion if we did not rely on multiple imputation. Among US-born Latinos: affirmative action, 15.6%, aid to blacks 27.2%, fair jobs 18.5%, death penalty 15.02% and welfare 11.8%. Among foreign-born Latinos: affirmative action 25.6%, aid to blacks 28.8%, fair jobs 20%, death penalty 21.6% and welfare 20%. Among whites: affirmative action 13.7%, aid to blacks 23.1%, fair jobs 16.9%, death penalty 14.6% and welfare 12.5%.

Table A31. Alternative Specifications, Latinos (US-Born), 2012

|                    | Affirmative Action |                    |                    | Aid to Blacks      |                   |                   | Fair Jobs          |                    |                    |
|--------------------|--------------------|--------------------|--------------------|--------------------|-------------------|-------------------|--------------------|--------------------|--------------------|
|                    | Table 3            | No MI              | No Controls        | Table 3            | No MI             | No Controls       | Table 3            | No MI              | No Controls        |
| Neg. Stereotypes   | -0.03<br>(0.14)    | 0.03<br>(0.17)     | -0.04<br>(0.14)    | -0.12<br>(0.13)    | -0.12<br>(0.13)   | -0.23<br>(0.17)   | -0.39***<br>(0.14) | -0.44***<br>(0.14) | -0.62***<br>(0.17) |
| Denial of Sympathy | -0.45***<br>(0.10) | -0.51***<br>(0.11) | -0.49***<br>(0.09) | -0.20**<br>(0.09)  | -0.19**<br>(0.10) | -0.26**<br>(0.11) | -0.27**<br>(0.11)  | -0.29***<br>(0.09) | -0.43<br>(0.10)    |
| Party ID           | -0.10<br>(0.07)    | -0.07<br>(0.08)    | ---<br>---         | -0.09<br>(0.07)    | -0.08<br>(0.08)   | ---<br>---        | -0.17<br>(0.11)    | -0.20*<br>(0.11)   | ---<br>---         |
| Limited Gov't      | -0.07<br>(0.07)    | -0.07<br>(0.06)    | ---<br>---         | -0.05<br>(0.06)    | -0.07<br>(0.08)   | ---<br>---        | -0.16<br>(0.11)    | -0.15<br>(0.11)    | ---<br>---         |
| Egalitarianism     | 0.09<br>(0.16)     | 0.18<br>(0.18)     | ---<br>---         | 0.47***<br>(0.14)  | 0.48**<br>(0.15)  | ---<br>---        | 0.80***<br>(0.17)  | 0.80***<br>(0.16)  | ---<br>---         |
| Age                | -0.12<br>(0.11)    | -0.14<br>(0.13)    | ---<br>---         | -0.24***<br>(0.10) | -0.35<br>(0.10)   | ---<br>---        | -0.17<br>(0.13)    | -0.23*<br>(0.13)   | ---<br>---         |
| Male               | 0.04<br>(0.05)     | 0.04<br>(0.06)     | ---<br>---         | -0.00<br>(0.04)    | -0.00<br>(0.05)   | ---<br>---        | 0.05<br>(0.06)     | 0.06<br>(0.05)     | ---<br>---         |
| Income             | 0.04<br>(0.11)     | 0.10<br>(0.13)     | ---<br>---         | -0.10<br>(0.10)    | -0.04<br>(0.11)   | ---<br>---        | -0.03<br>(0.12)    | -0.05<br>(0.12)    | ---<br>---         |
| Income - Missing   | 0.06<br>(0.08)     | 0.05<br>(0.09)     | ---<br>---         | -0.06<br>(0.06)    | -0.05<br>(0.07)   | ---<br>---        | 0.11<br>(0.10)     | 0.11<br>(0.09)     | ---<br>---         |
| Education          | -0.09<br>(0.10)    | -0.08<br>(0.12)    | ---<br>---         | -0.01<br>(0.08)    | -0.02<br>(0.08)   | ---<br>---        | -0.04<br>(0.12)    | -0.05<br>(0.13)    | ---<br>---         |
| Constant           | 0.56***<br>(0.17)  | 0.46**<br>(0.20)   | 0.55***<br>(0.09)  | 0.51***<br>(0.16)  | 0.48***<br>(0.18) | 0.70***<br>(0.12) | 0.49**<br>(0.19)   | 0.56***<br>(0.17)  | 1.10***<br>(0.08)  |
| N                  | 346                | 292                | 303                | 346                | 252               | 260               | 346                | 282                | 292                |
| F-statistic        | 4.36               | 3.94               | 14.54              | 4.45               | 5.97              | 3.91              | 13.56              | 22.99              | 30.75              |

Table A32. Alternative Specifications, Latinos (US-Born), 2012

|                    | Death Penalty    |                   |                   | Welfare            |                    |                    | Vote Choice        |                    |                   |
|--------------------|------------------|-------------------|-------------------|--------------------|--------------------|--------------------|--------------------|--------------------|-------------------|
|                    | Table 3          | No MI             | No Controls       | Table 3            | No MI              | No Controls        | Table 3            | No MI              | No Controls       |
| Neg. Stereotypes   | 0.03<br>(0.15)   | 0.02<br>(0.14)    | 0.06<br>(0.14)    | -1.07**<br>(0.43)  | -1.06**<br>(0.43)  | 1.14**<br>(0.38)   | 0.13<br>(0.63)     | 0.58<br>(0.58)     | 0.16<br>(0.50)    |
| Denial of Sympathy | 0.26**<br>(0.12) | 0.24**<br>(0.12)  | 0.27***<br>(0.10) | -0.47<br>(0.34)    | -0.47<br>(0.34)    | -0.51<br>(0.30)    | -0.97<br>(0.61)    | -0.87*<br>(0.51)   | -1.13**<br>(0.45) |
| Party ID           | 0.11<br>(0.10)   | 0.17**<br>(0.08)  | ---               | -1.16***<br>(0.33) | -1.20***<br>(0.30) | ---                | -3.27***<br>(0.40) | -3.54***<br>(0.42) | ---               |
| Limited Government | -0.06<br>(0.10)  | -0.06<br>(0.09)   | ---               | -0.04<br>(0.30)    | -0.03<br>(0.30)    | ---                | -0.91**<br>(0.38)  | -1.07***<br>(0.37) | ---               |
| Egalitarianism     | -0.14<br>(0.19)  | -0.15<br>(0.17)   | ---               | -0.06<br>(0.52)    | -0.04<br>(0.52)    | ---                | 1.52*<br>(0.82)    | 1.74**<br>(0.87)   | ---               |
| Age                | 0.21*<br>(0.12)  | 0.16<br>(0.12)    | ---               | -0.72*<br>(0.41)   | -0.73*<br>(0.42)   | ---                | 0.08<br>(0.45)     | 0.10<br>(0.46)     | ---               |
| Male               | 0.01<br>(0.06)   | 0.00<br>(0.06)    | ---               | -0.36**<br>(0.17)  | -0.37**<br>(0.17)  | ---                | -0.38<br>(0.24)    | -0.33<br>(0.24)    | ---               |
| Income             | 0.16<br>(0.12)   | 0.17<br>(0.13)    | ---               | -1.31***<br>(0.40) | -1.31***<br>(0.40) | ---                | -0.33<br>(0.51)    | -0.27<br>(0.54)    | ---               |
| Income - Missing   | 0.02<br>(0.09)   | -0.01<br>(0.09)   | ---               | -0.17<br>(0.24)    | -0.17<br>(0.24)    | ---                | -0.07<br>(0.44)    | -0.06<br>(0.43)    | ---               |
| Education          | -0.08<br>(0.11)  | -0.08<br>(0.13)   | ---               | -0.01<br>(0.41)    | -0.03<br>(0.40)    | ---                | -0.04<br>(0.46)    | 0.07<br>(0.46)     | ---               |
| Constant           | 0.46**<br>(0.20) | 0.49***<br>(0.18) | 0.47***<br>(0.09) | ---                | ---                | ---                | 2.43***<br>(0.84)  | 2.06***<br>(0.71)  | 1.23***<br>(0.34) |
| Cut Point 1        | ---              | ---               | ---               | -2.54***<br>(0.63) | -2.54***<br>(0.62) | -1.31***<br>(0.27) | ---                | ---                | ---               |
| Cut Point 2        | ---              | ---               | ---               | -1.30**<br>(0.59)  | -1.30**<br>(0.59)  | -0.19<br>(0.26)    | ---                | ---                | ---               |
| N                  | 345              | 294               | 305               | 310                | 305                | 316                | 413                | 405                | 413               |
| F-statistic        | 1.80             | 2.28              | 4.29              | 5.27               | 5.73               | 6.92               | 13.99              | 14.19              | 3.29              |



Table A33. Latinos (Foreign-Born), 2012

|                           | Affirmative Action |                    |                   | Aid to Blacks     |                    |                    | Fair Jobs          |                    |                    |
|---------------------------|--------------------|--------------------|-------------------|-------------------|--------------------|--------------------|--------------------|--------------------|--------------------|
|                           | Table 3            | No MI              | No Controls       | Table 3           | No MI              | No Controls        | Table 3            | No MI              | No Controls        |
| Neg. Stereotypes - Blacks | -0.14<br>(0.21)    | -0.12<br>(0.21)    | 0.07<br>(0.23)    | -0.30*<br>(0.17)  | -0.26*<br>(0.15)   | -0.21<br>(0.16)    | -0.43**<br>(0.20)  | -0.55*<br>(0.18)   | -0.48**<br>(0.19)  |
| Denial of Sympathy        | -0.37**<br>(0.16)  | -0.42**<br>(0.18)  | -0.40**<br>(0.20) | -0.39<br>(0.15)   | -0.38***<br>(0.13) | -0.50***<br>(0.12) | -0.40***<br>(0.14) | -0.42***<br>(0.13) | -0.44***<br>(0.14) |
| Party ID                  | -0.11<br>(0.14)    | -0.08<br>(0.12)    | ---<br>---        | -0.22*<br>(0.12)  | -0.30***<br>(0.10) | ---<br>---         | 0.14<br>(0.14)     | 0.18<br>(0.13)     | ---<br>---         |
| Limited Government        | -0.07<br>(0.13)    | -0.08<br>(0.12)    | ---<br>---        | -0.05<br>(0.12)   | -0.02<br>(0.12)    | ---<br>---         | -0.27*<br>(0.14)   | -0.25*<br>(0.14)   | ---<br>---         |
| Egalitarianism            | -0.24<br>(0.25)    | 0.18<br>(0.27)     | ---<br>---        | 0.07<br>(0.25)    | 0.13<br>(0.23)     | ---<br>---         | -0.16<br>(0.35)    | 0.11<br>(0.35)     | ---<br>---         |
| Age                       | 0.01<br>(0.18)     | -0.02<br>(0.16)    | ---<br>---        | 0.07<br>(0.17)    | 0.02<br>(0.18)     | ---<br>---         | 0.12<br>(0.18)     | 0.16<br>(0.17)     | ---<br>---         |
| Male                      | 0.05<br>(0.07)     | 0.07<br>(0.08)     | ---<br>---        | -0.00<br>(0.07)   | 0.07<br>(0.07)     | ---<br>---         | 0.26**<br>(0.08)   | -0.31***<br>(0.09) | ---<br>---         |
| Income                    | 0.13<br>(0.20)     | 0.37*<br>(0.20)    | ---<br>---        | -0.07<br>(0.19)   | -0.02<br>(0.20)    | ---<br>---         | -0.30<br>(0.20)    | -0.14<br>(0.20)    | ---<br>---         |
| Income - Missing          | -0.17<br>(0.11)    | -0.10<br>(0.12)    | ---<br>---        | 0.10<br>(0.13)    | 0.11<br>(0.15)     | ---<br>---         | -0.13<br>(0.14)    | -0.09<br>(0.17)    | ---<br>---         |
| Education                 | -0.33*<br>(0.17)   | -0.49***<br>(0.16) | ---<br>---        | -0.00<br>(0.15)   | -0.14<br>(0.16)    | ---<br>---         | 0.11<br>(0.18)     | -0.02<br>(0.17)    | ---<br>---         |
| Constant                  | 0.85***<br>(0.29)  | 0.77**<br>(0.33)   | 0.48<br>(0.17)    | 0.85***<br>(0.30) | 0.84***<br>(0.32)  | 0.85***<br>(0.11)  | 1.06***<br>(0.31)  | 0.83**<br>(0.32)   | 1.09***<br>(0.11)  |
| N                         | 125                | 93                 | 102               | 126               | 89                 | 95                 | 125                | 100                | 109                |
| F-statistic               | 1.72               | 3.94               | 2.06              | 5.58              | 9.58               | 11.36              | 6.92               | 8.54               | 10.57              |

Table A34. Latinos (Foreign-Born), 2012

|                    | Death Penalty    |                    |                   | Welfare           |                    |                    | Vote Choice        |                    |                   |
|--------------------|------------------|--------------------|-------------------|-------------------|--------------------|--------------------|--------------------|--------------------|-------------------|
|                    | Table 3          | No MI              | No Controls       | Table 3           | No MI              | No Controls        | Table 3            | No MI              | No Controls       |
| Neg. Stereotypes   | 0.46**<br>(0.20) | 0.53***<br>(0.20)  | 0.51***<br>(0.17) | 0.85<br>(0.80)    | 1.07<br>(0.80)     | 1.22*<br>(0.70)    | 1.45<br>(1.09)     | 1.75<br>(1.17)     | 0.39<br>(0.65)    |
| Denial of Sympathy | -0.14<br>(0.18)  | -0.38**<br>(0.16)  | -0.23<br>(0.17)   | -2.05**<br>(0.79) | -2.58***<br>(0.72) | -2.34***<br>(0.55) | -0.42<br>(0.84)    | -0.79<br>(0.77)    | -1.09**<br>(0.52) |
| Party ID           | 0.14<br>(0.18)   | 0.35**<br>(0.14)   | ---<br>---        | -0.70<br>(0.48)   | -0.80*<br>(0.47)   | ---<br>---         | -4.14***<br>(0.79) | -4.31***<br>(0.89) | ---<br>---        |
| Limited Gov't      | -0.03<br>(0.18)  | -0.16<br>(0.15)    | ---<br>---        | -0.94*<br>(0.54)  | -1.12**<br>(0.53)  | ---<br>---         | -0.80*<br>(0.48)   | -0.64<br>(0.52)    | ---<br>---        |
| Egalitarianism     | 0.13<br>(0.35)   | 0.07<br>(0.31)     | ---<br>---        | -0.35<br>(1.07)   | -0.57<br>(1.07)    | ---<br>---         | 0.94<br>(0.98)     | 0.70<br>(1.00)     | ---<br>---        |
| Age                | -0.03<br>(0.20)  | 0.14<br>(0.17)     | ---<br>---        | -0.22<br>(0.56)   | -0.28<br>(0.55)    | ---<br>---         | -2.06***<br>(0.57) | -2.55***<br>(0.69) | ---<br>---        |
| Male               | -0.10<br>(0.10)  | -0.24***<br>(0.09) | ---<br>---        | 0.50<br>(0.30)    | 0.48<br>(0.29)     | ---<br>---         | 1.16***<br>(0.38)  | 1.31***<br>(0.44)  | ---<br>---        |
| Income             | 0.30<br>(0.22)   | 0.21<br>(0.20)     | ---<br>---        | -0.41<br>(0.67)   | -0.47<br>(0.67)    | ---<br>---         | -0.83<br>(0.62)    | -0.68<br>(0.63)    | ---<br>---        |
| Income - Missing   | 0.00<br>(0.15)   | -0.11<br>(0.15)    | ---<br>---        | -0.04<br>(0.45)   | -0.11<br>(0.41)    | ---<br>---         | ---<br>---         | ---<br>---         | ---<br>---        |
| Education          | -0.14<br>(0.22)  | 0.01<br>(0.21)     | ---<br>---        | -1.77**<br>(0.69) | 1.66**<br>(0.68)   | ---<br>---         | -0.14<br>(0.71)    | -0.32<br>(0.65)    | ---<br>---        |
| Constant           | 0.33<br>(0.34)   | 0.41<br>(0.30)     | 0.48<br>(0.15)    | ---<br>---        | ---<br>---         | ---<br>---         | 2.77**<br>(1.37)   | 3.15**<br>(1.29)   | 1.15**<br>(0.51)  |
| Cut Point 1        | ---<br>---       | ---<br>---         | ---<br>---        | -3.00**<br>(1.17) | -3.51***<br>(1.09) | -1.48***<br>(0.46) | ---<br>---         | ---<br>---         | ---<br>---        |
| Cut Point 2        | ---<br>---       | ---<br>---         | ---<br>---        | -1.50<br>(1.12)   | -1.92*<br>(1.07)   | -0.37<br>(0.46)    | ---<br>---         | ---<br>---         | ---<br>---        |
| N                  | 125              | 98                 | 107               | 106               | 100                | 109                | 201                | 190                | 207               |
| F-statistic        | 1.17             | 5.24               | 4.73              | 3.44              | 4.98               | 9.36               | 6.82               | 6.23               | 2.60              |

Table A35. White (Non-Latino), 2012

|                    | Affirmative Action |                    |                    | Aid to Blacks      |                    |                    | Fair Jobs          |                    |                    |
|--------------------|--------------------|--------------------|--------------------|--------------------|--------------------|--------------------|--------------------|--------------------|--------------------|
|                    | Table 3            | No MI              | No Controls        | Table 3            | No MI              | No Controls        | Table 3            | No MI              | No Controls        |
| Neg. Stereotypes   | -0.14**<br>(0.06)  | -0.14**<br>(0.06)  | -0.19***<br>(0.06) | -0.11**<br>(0.05)  | -0.11*<br>(0.06)   | -0.18***<br>(0.06) | -0.14*<br>(0.08)   | -0.13<br>(0.08)    | -0.30***<br>(0.09) |
| Denial of Sympathy | -0.22***<br>(0.05) | -0.24***<br>(0.05) | -0.25***<br>(0.05) | -0.21***<br>(0.05) | -0.21***<br>(0.06) | -0.27***<br>(0.06) | -0.30***<br>(0.07) | -0.30***<br>(0.08) | -0.44***<br>(0.08) |
| Party ID           | -0.09**<br>(0.04)  | -0.07<br>(0.04)    | ---<br>---         | -0.16***<br>(0.04) | -0.16***<br>(0.04) | ---<br>---         | -0.09<br>(0.06)    | -0.09<br>(0.06)    | ---<br>---         |
| Limited Government | -0.09**<br>(0.04)  | -0.09**<br>(0.04)  | ---<br>---         | -0.08**<br>(0.03)  | -0.07**<br>(0.03)  | ---<br>---         | -0.28***<br>(0.05) | -0.26***<br>(0.05) | ---<br>---         |
| Egalitarianism     | 0.16**<br>(0.06)   | 0.16**<br>(0.06)   | ---<br>---         | 0.23***<br>(0.06)  | 0.23***<br>(0.06)  | ---<br>---         | 0.63***<br>(0.09)  | 0.64***<br>(0.09)  | ---<br>---         |
| Age                | -0.04<br>(0.04)    | -0.05<br>(0.04)    | ---<br>---         | -0.07**<br>(0.04)  | -0.05<br>(0.04)    | ---<br>---         | -0.10*<br>(0.05)   | -0.11<br>(0.05)    | ---<br>---         |
| Male               | 0.03<br>(0.02)     | 0.04<br>(0.02)     | ---<br>---         | 0.03*<br>(0.02)    | 0.04*<br>(0.02)    | ---<br>---         | 0.07**<br>(0.03)   | 0.07**<br>(0.03)   | ---<br>---         |
| Income             | -0.06<br>(0.05)    | -0.05<br>(0.05)    | ---<br>---         | -0.07*<br>(0.04)   | -0.04<br>(0.04)    | ---<br>---         | 0.04<br>(0.06)     | 0.05<br>(0.06)     | ---<br>---         |
| Income - Missing   | -0.07*<br>(0.04)   | 0.05<br>(0.09)     | ---<br>---         | -0.03<br>(0.04)    | -0.01<br>(0.04)    | ---<br>---         | -0.06<br>(0.05)    | -0.08<br>(0.05)    | ---<br>---         |
| Education          | -0.04<br>(0.04)    | -0.07*<br>(0.04)   | ---<br>---         | 0.06<br>(0.04)     | 0.07**<br>(0.04)   | ---<br>---         | 0.10<br>(0.05)     | 0.09<br>(0.06)     | ---<br>---         |
| Constant           | 0.45***<br>(0.08)  | 0.45***<br>(0.08)  | 0.42***<br>(0.05)  | 0.54***<br>(0.08)  | 0.48***<br>(0.08)  | 0.58***<br>(0.05)  | 0.52***<br>(0.10)  | 0.51***<br>(0.11)  | 0.92***<br>(0.07)  |
| N                  | 917                | 792                | 830                | 918                | 706                | 737                | 917                | 763                | 800                |
| F-statistic        | 11.76              | 3.94               | 19.74              | 19.55              | 19.34              | 21.46              | 50.59              | 51.17              | 25.99              |

Table A36. White (Non-Latino), 2012

|                    | Death Penalty      |                    |                   | Welfare            |                    |                    | Vote Choice        |                    |                    |
|--------------------|--------------------|--------------------|-------------------|--------------------|--------------------|--------------------|--------------------|--------------------|--------------------|
|                    | Table 3            | No MI              | No Controls       | Table 3            | No MI              | No Controls        | Table 3            | No MI              | No Controls        |
| Neg. Stereotypes   | 0.20***<br>(0.07)  | 0.20***<br>(0.07)  | 0.32***<br>(0.07) | -0.40<br>(0.28)    | -0.40<br>(0.28)    | -0.74***<br>(0.26) | -0.58**<br>(0.25)  | -0.70***<br>(0.25) | -1.07***<br>(0.17) |
| Denial of Sympathy | 0.15**<br>(0.06)   | 0.16**<br>(0.07)   | 0.23***<br>(0.07) | -0.11<br>(0.23)    | -0.11<br>(0.23)    | -0.62***<br>(0.21) | 0.07<br>(0.25)     | -0.05<br>(0.26)    | -0.95***<br>(0.15) |
| Party ID           | 0.18***<br>(0.05)  | 0.18***<br>(0.05)  | ---<br>---        | -0.51***<br>(0.17) | -0.51***<br>(0.17) | ---<br>---         | -3.13***<br>(0.18) | -3.38***<br>(0.18) | ---<br>---         |
| Limited Gov't      | 0.02<br>(0.05)     | 0.01<br>(0.05)     | ---<br>---        | -0.62***<br>(0.15) | -0.64***<br>(0.15) | ---<br>---         | -0.82***<br>(0.14) | -0.85***<br>(0.14) | ---<br>---         |
| Egalitarianism     | -0.14<br>(0.09)    | -0.14<br>(0.09)    | ---<br>---        | 1.21***<br>(0.30)  | 1.22***<br>(0.30)  | ---<br>---         | 1.50***<br>(0.32)  | 1.43***<br>(0.29)  | ---<br>---         |
| Age                | -0.00<br>(0.05)    | 0.00<br>(0.06)     | ---<br>---        | 0.31*<br>(0.18)    | 0.32*<br>(0.18)    | ---<br>---         | -0.05<br>(0.18)    | -0.19<br>(0.18)    | ---<br>---         |
| Male               | 0.02<br>(0.03)     | 0.02<br>(0.03)     | ---<br>---        | -0.15<br>(0.10)    | -0.15<br>(0.10)    | ---<br>---         | -0.00<br>(0.09)    | -0.03<br>(0.09)    | ---<br>---         |
| Income             | 0.01<br>(0.06)     | 0.01<br>(0.07)     | ---<br>---        | -0.59***<br>(0.19) | -0.61***<br>(0.19) | ---<br>---         | -0.13<br>(0.19)    | -0.11<br>(0.20)    | ---<br>---         |
| Income - Missing   | 0.01<br>(0.05)     | -0.00<br>(0.05)    | ---<br>---        | -0.13<br>(0.19)    | -0.15<br>(0.18)    | ---<br>---         | 0.35<br>(0.24)     | 0.28<br>(0.25)     | ---<br>---         |
| Education          | -0.28***<br>(0.10) | -0.29***<br>(0.06) | ---<br>---        | 0.18<br>(0.18)     | 0.19<br>(0.18)     | ---<br>---         | 0.58***<br>(0.18)  | 0.63***<br>(0.18)  | ---<br>---         |
| Constant           | 0.62***<br>(0.06)  | 0.63***<br>(0.11)  | 0.41***<br>(0.06) | ---<br>---         | ---<br>---         | ---<br>---         | 0.96**<br>(0.39)   | 1.31***<br>(0.35)  | 0.95***<br>(0.13)  |
| Cut Point 1        | ---<br>---         | ---<br>---         | ---<br>---        | -0.34<br>(0.35)    | -0.39<br>(0.35)    | -0.85***<br>(0.17) | ---<br>---         | ---<br>---         | ---<br>---         |
| Cut Point 2        | ---<br>---         | ---<br>---         | ---<br>---        | 1.18***<br>(0.34)  | 1.18***<br>(0.34)  | 0.51***<br>(0.16)  | ---<br>---         | ---<br>---         | ---<br>---         |
| N                  | 917                | 784                | 821               | 819                | 803                | 839                | 2,591              | 2,539              | 2,584              |
| F-statistic        | 12.87              | 11.48              | 21.43             | 14.67              | 15.41              | 11.32              | 67.71              | 68.73              | 47.24              |

### **Appendix 7: Alternative Specifications, Focusing on Vote Choice**

As an additional check on our results, we re-estimate our models using only FTF interviews in the 2012 ANES. In order to ensure a high enough sample size, we use an alternative measure of vote choice – one which categorizes voting for Obama as 1 and all other behaviors (voting for Romney, not voting at all) as 0. Given that previous research (Krupnikov and Piston, forthcoming) suggests that people with higher levels of racial prejudice both opt for white candidates and fail to turn out in the presence of a Black candidate, this measure is a reasonable means of dealing with a small sample due to non-turnout. We call the “Obama or all else” measure “Measure 1.” In order to ensure robustness, we also estimate this model using racial resentment.

We also use a second measure, in which voting for Obama is coded as 1 and voting for Romney is coded as 0. This measure – “Measure 2” – excludes non-voters. We estimate models using this measure for native-born Latino and White respondents. Given rates of turnout among foreign-born Latinos reported in FTF interviews, the resulting N is too small to estimate a valid model using probit.

Finally, we estimate models using Measure 1 for the 2008 data as well to ensure that we again obtain similar results.

Across all cases our original conclusions hold. Racial prejudice is sometimes related to vote choice among Latinos, although the relationship is not as consistent as the relationship between racial prejudice and explicitly racial policies such as affirmative action or aid to Blacks.

In 2012 all models in Table A37 use the weight associated with the FTF sample; the 2008 models rely on the general survey weight for 2008.

Table A37. Alternative Specifications, Vote Choice, 2012

|                    | Latinos, US Born   |                   |                    |                    | Latinos, Foreign Born |                 |                    | Whites, Non-Latino |                    |                    |                    |
|--------------------|--------------------|-------------------|--------------------|--------------------|-----------------------|-----------------|--------------------|--------------------|--------------------|--------------------|--------------------|
|                    | Measure 1          | Measure 1         | Measure 1          | Measure 2          | Measure 1             | Measure 1       | Measure 1          | Measure 1          | Measure 1          | Measure 1          | Measure 2          |
| Neg. Stereotypes   | -0.19<br>(0.55)    | -0.14<br>(0.51)   | ---<br>(0.49)      | 1.18<br>(0.89)     | 0.99<br>(0.73)        | 0.56<br>(0.73)  | ---<br>(0.91)      | -0.82**<br>(0.32)  | -1.02***<br>(0.27) | ---<br>(0.33)      | -1.59***<br>(0.45) |
| Denial of Sympathy | -0.61<br>(0.39)    | -0.66**<br>(0.32) | ---<br>(0.49)      | -1.79**<br>(0.69)  | -0.61<br>(0.64)       | -0.25<br>(0.57) | ---<br>(0.91)      | 0.02<br>(0.32)     | -0.60***<br>(0.23) | ---<br>(0.33)      | 0.09<br>(0.46)     |
| Racial Resentment  | ---<br>(0.49)      | ---<br>(0.49)     | -0.21<br>(0.49)    | ---<br>(0.49)      | ---<br>(0.49)         | ---<br>(0.49)   | -0.39<br>(0.91)    | ---<br>(0.33)      | ---<br>(0.33)      | -0.93***<br>(0.33) | ---<br>(0.33)      |
| Party ID           | -2.02***<br>(0.37) | ---<br>(0.37)     | -2.00***<br>(0.38) | -4.94***<br>(1.00) | -2.60***<br>(0.70)    | ---<br>(0.70)   | -2.53***<br>(0.69) | -2.65***<br>(0.28) | ---<br>(0.28)      | -2.55***<br>(0.28) | -3.31***<br>(0.35) |
| Limited Gov't      | -0.52<br>(0.33)    | ---<br>(0.33)     | -0.56*<br>(0.32)   | -0.49<br>(0.46)    | -0.01<br>(0.67)       | ---<br>(0.67)   | -0.10<br>(0.65)    | -0.29<br>(0.21)    | ---<br>(0.21)      | -0.23<br>(0.21)    | -0.82***<br>(0.27) |
| Egalitarianism     | -0.07<br>(0.65)    | ---<br>(0.65)     | 0.13<br>(0.65)     | -0.21<br>(1.05)    | 2.01<br>(1.26)        | ---<br>(1.26)   | 0.90<br>(1.30)     | 1.44***<br>(0.39)  | ---<br>(0.39)      | 1.28***<br>(0.44)  | 1.35***<br>(0.49)  |
| Age                | 0.64<br>(0.41)     | ---<br>(0.41)     | 0.79*<br>(0.40)    | -0.52<br>(0.74)    | -0.03<br>(0.75)       | ---<br>(0.75)   | 0.11<br>(0.79)     | 0.39*<br>(0.24)    | ---<br>(0.24)      | 0.41*<br>(0.23)    | -0.07<br>(0.31)    |
| Male               | 0.20<br>(0.23)     | ---<br>(0.23)     | 0.19<br>(0.22)     | 0.39<br>(0.32)     | -0.27<br>(0.36)       | ---<br>(0.36)   | -0.54<br>(0.40)    | 0.12<br>(0.13)     | ---<br>(0.13)      | 0.05<br>(0.13)     | 0.34*<br>(0.18)    |
| Income             | 0.49<br>(0.47)     | ---<br>(0.47)     | 0.46<br>(0.46)     | -0.82<br>(0.75)    | 2.24***<br>(0.80)     | ---<br>(0.80)   | 1.78**<br>(0.83)   | 0.34<br>(0.26)     | ---<br>(0.26)      | 0.28<br>(0.28)     | -0.41<br>(0.36)    |
| Inc – Missing      | -0.65**<br>(0.31)  | ---<br>(0.31)     | -0.63**<br>(0.31)  | -1.59**<br>(0.72)  | 0.58<br>(0.59)        | ---<br>(0.59)   | 0.52<br>(0.61)     | 0.28<br>(0.25)     | ---<br>(0.25)      | 0.25<br>(0.25)     | 0.16<br>(0.34)     |
| Education          | 1.06**<br>(0.45)   | ---<br>(0.45)     | 1.00**<br>(0.45)   | 0.32<br>(0.87)     | -0.51<br>(0.71)       | ---<br>(0.71)   | -0.08<br>(0.69)    | 0.86***<br>(0.25)  | ---<br>(0.25)      | 0.78***<br>(0.26)  | 0.66**<br>(0.33)   |
| Constant           | 0.49<br>(0.66)     | 0.48*<br>(0.29)   | -0.03<br>(0.68)    | 4.77***<br>(1.20)  | -1.32<br>(1.24)       | -0.35<br>(0.46) | -0.31<br>(1.37)    | -0.57<br>(0.46)    | 0.38**<br>(0.19)   | -0.25<br>(0.49)    | 1.47**<br>(0.62)   |
| Observations       | 306                | 318               | 306                | 170                | 103                   | 113             | 105                | 807                | 847                | 810                | 576                |
| F- Statistic       | 7.48               | 2.50              | 7.90               | 7.55               | 2.77                  | 0.32            | 3.07               | 23.17              | 12.10              | 24.46              | 20.96              |

Table A38 Alternative Specifications, Vote Choice, 2008

|                    | Latinos, US-Born |           |           | Latinos, Foreign-Born |           |           | Whites    |           |           |
|--------------------|------------------|-----------|-----------|-----------------------|-----------|-----------|-----------|-----------|-----------|
|                    | Measure 1        | Measure 1 | Measure 1 | Measure 1             | Measure 1 | Measure 1 | Measure 1 | Measure 1 | Measure 1 |
| Neg. Stereotypes   | -0.59*           | -0.63**   | ---       | -0.30                 | -0.44     | ---       | -0.49     | -0.59**   | ---       |
|                    | (0.35)           | (0.31)    | ---       | (0.78)                | (0.52)    | ---       | (0.32)    | (0.24)    | ---       |
| Denial of Sympathy | -0.03            | -0.65**   | ---       | 0.06                  | -0.61     | ---       | -0.23     | -0.94***  | ---       |
|                    | (0.32)           | (0.25)    | ---       | (0.46)                | (0.41)    | ---       | (0.23)    | (0.17)    | ---       |
| Racial Resentment  | ---              | ---       | -1.33***  | ---                   | ---       | -0.37     | ---       | ---       | -1.46***  |
|                    | ---              | ---       | (0.41)    | ---                   | ---       | (0.96)    | ---       | ---       | (0.28)    |
| Party ID           | -1.87***         | ---       | -1.96***  | -3.03***              | ---       | -2.80***  | -2.52***  | ---       | -2.51***  |
|                    | (0.34)           | ---       | (0.35)    | (0.67)                | ---       | (0.62)    | (0.22)    | ---       | (0.23)    |
| Limited Gov't      | -0.04            | ---       | 0.03      | -1.54**               | ---       | -1.66**   | -0.46***  | ---       | -0.52***  |
|                    | (0.29)           | ---       | (0.31)    | (0.74)                | ---       | (0.70)    | (0.18)    | ---       | (0.18)    |
| Egalitarianism     | 1.57***          | ---       | 1.24**    | 2.34*                 | ---       | 2.40*     | 1.34***   | ---       | 0.96**    |
|                    | (0.54)           | ---       | (0.58)    | (1.20)                | ---       | (1.24)    | (0.38)    | ---       | (0.39)    |
| Age                | 0.42             | ---       | 0.44      | 0.05                  | ---       | 0.30      | -0.01     | ---       | 0.11      |
|                    | (0.42)           | ---       | (0.41)    | (0.95)                | ---       | (0.88)    | (0.26)    | ---       | (0.25)    |
| Male               | -0.45**          | ---       | -0.42**   | -0.18                 | ---       | -0.10     | -0.06     | ---       | -0.12     |
|                    | (0.18)           | ---       | (0.18)    | (0.34)                | ---       | (0.32)    | (0.12)    | ---       | (0.12)    |
| Income             | 0.57             | ---       | 0.48      | 1.40*                 | ---       | 1.29*     | 0.58**    | ---       | 0.59**    |
|                    | (0.45)           | ---       | (0.45)    | (0.78)                | ---       | (0.73)    | (0.26)    | ---       | (0.26)    |
| Inc – Missing      | -0.24            | ---       | -0.48     | -0.84                 | ---       | -0.90     | 0.40      | ---       | 0.38      |
|                    | (0.62)           | ---       | (0.66)    | (0.79)                | ---       | (0.84)    | (0.30)    | ---       | (0.29)    |
| Education          | 1.09             | ---       | 1.18*     | 0.98                  | ---       | 1.23      | 0.99*     | ---       | 0.75      |
|                    | (0.72)           | ---       | (0.71)    | (0.85)                | ---       | (0.85)    | (0.54)    | ---       | (0.53)    |
| Constant           | -1.01            | 0.62***   | -0.37     | -1.16                 | 0.35      | -1.38     | -0.56     | 0.39***   | 0.40      |
|                    | (0.68)           | (0.19)    | (0.73)    | (0.97)                | (0.39)    | (0.98)    | (0.52)    | (0.14)    | (0.58)    |
| Observations       | 363              | 385       | 364       | 101                   | 108       | 101       | 954       | 1017      | 979       |
| F- Statistic       | 8.16             | 6.88      | 10.28     | 3.79                  | 1.26      | 3.77      | 21.31     | 20.40     | 33.10     |





## Appendix 8. Explaining the Latino/White Racial Divide under Various Hypothetical Circumstances

In order to determine the cause of the divide between Latinos and whites on policy relevant to blacks and vote choice for Obama, we follow the procedure outlined in Kinder and Winter (2001)'s analysis of the black/white policy opinion divide. First, relying on the 2008 ANES, we take the difference between mean Latino opinion and mean white opinion, resulting in the "raw" divide: the divide in opinion "unencumbered by controls" (445). Next, given that we want to "compare the racial divide in raw form with our best guess of what the racial divide would look like under various hypothetical circumstances" (445), we estimate a series of regression models, one per policy<sup>1</sup> (and one for electoral behavior), including both Latinos and whites in each model.<sup>2</sup> We also include interaction terms between each independent variable and an indicator variable for whether the respondent is Latino, in order to account for the possibility that each independent variable influences Latinos and whites differently. The coefficients from these models allow us to simulate, for example, what would happen to the Latino/white divide on opinion about affirmative action if differences in partisanship were to disappear.

We conduct such simulations for a given dependent variable, by: (1) setting values for all respondents on a given set of independent variables to the mean value for Latinos;<sup>3</sup> (2) allowing all other values of independent variables to take on their "observed values" for each respondent<sup>4</sup> (n.b., Hanmer and Kalkan 2013); (3) generating predicted values for each respondent; and (4) taking the absolute value of the difference between the mean predicted value of the dependent variable for Latinos and the mean predicted value for whites. This process yields the simulated divide in opinion if differences between Latinos and whites on a given set of independent variable were to disappear.<sup>5</sup>

---

<sup>1</sup> We do not conduct this analysis for opinion about welfare, since mean Latino and white support for welfare are nearly identical.

<sup>2</sup> Foreign-born and U.S.-born Latinos are collapsed in this analysis in order to facilitate the focus of the presentation on the Latino/white divide.

<sup>3</sup> Alternatively, we could have set values to the white mean or to the Latino/white midpoint, and a complete accounting for the Latino/white divide might have looked at all three. It is sufficient for our purposes to note that any of these approaches would have yielded the same general finding – that racial attitudes cannot explain this divide, while other factors such as partisanship and principles make more headway.

<sup>4</sup> This is the only respect in which our approach differs from Kinder and Winter's (2001); following the logic of Hanmer and Kalkan (2013), we argue that an observed values approach is more defensible because it does not construct estimates based on the (possibly non-existent) "average respondent."

<sup>5</sup> These analyses are admittedly unrealistic in that they assume changes in one independent variable would not affect the others. Like Kinder and Winter (2001), we view these analyses as "heuristic exercises to help us unravel how race is entwined with opinion."

Table A39: Predicting Latino and White Policy Opinion and Electoral Behavior

|                           | Aff. Action        | Aid to Blacks      | Fair Jobs          | Death Penalty      | Vote               |
|---------------------------|--------------------|--------------------|--------------------|--------------------|--------------------|
| Neg. Stereotypes - Blacks | -0.03<br>(0.05)    | -0.15***<br>(0.05) | -2.50***<br>(0.67) | 0.08<br>(0.07)     | -0.85<br>(0.78)    |
| Latino                    | 0.39**<br>(0.17)   | 0.56***<br>(0.17)  | 4.14**<br>(1.86)   | -0.69***<br>(0.21) | 1.81<br>(2.28)     |
| Latino X Ster.            | -0.09<br>(0.09)    | -0.01<br>(0.10)    | 0.40<br>(1.09)     | 0.04<br>(0.12)     | 0.03<br>(1.35)     |
| Denial of Sympathy        | -0.27***<br>(0.04) | -0.26***<br>(0.04) | -2.59***<br>(0.52) | 0.15***<br>(0.05)  | -0.87*<br>(0.52)   |
| Latino X Symp.            | 0.09<br>(0.08)     | 0.07<br>(0.07)     | -0.26<br>(0.88)    | 0.00<br>(0.09)     | -0.46<br>(0.92)    |
| Party ID (Republican)     | -0.11***<br>(0.03) | -0.13***<br>(0.03) | -0.51<br>(0.38)    | 0.13***<br>(0.04)  | -5.57***<br>(0.53) |
| Latino X PID              | -0.10<br>(0.06)    | -0.04<br>(0.08)    | 0.19<br>(0.74)     | 0.04<br>(0.09)     | 0.69<br>(0.87)     |
| Limited Government        | -0.06**<br>(0.02)  | -0.05*<br>(0.03)   | -0.79**<br>(0.35)  | 0.00<br>(0.04)     | -0.92**<br>(0.36)  |
| Latino X Lim. Govt.       | 0.03<br>(0.06)     | -0.10<br>(0.07)    | 0.33<br>(0.79)     | 0.01<br>(0.08)     | -0.00<br>(0.75)    |
| Egalitarianism            | 0.15**<br>(0.06)   | 0.24***<br>(0.06)  | 2.96***<br>(0.83)  | -0.25***<br>(0.09) | 2.73***<br>(0.88)  |
| Latino X Egal.            | -0.15<br>(0.13)    | -0.15<br>(0.12)    | -1.02<br>(1.56)    | -0.07<br>(0.16)    | -1.16<br>(1.49)    |
| Age                       | -0.05<br>(0.05)    | -0.01<br>(0.05)    | -0.62<br>(0.62)    | 0.07<br>(0.06)     | -1.70***<br>(0.55) |
| Latino X Age              | -0.04<br>(0.11)    | -0.07<br>(0.09)    | -0.28<br>(1.05)    | -0.04<br>(0.12)    | -0.56<br>(1.14)    |
| Male                      | 0.02<br>(0.02)     | 0.04**<br>(0.02)   | 0.61**<br>(0.26)   | 0.05*<br>(0.03)    | 0.36<br>(0.27)     |
| Latino X Male             | -0.05<br>(0.04)    | -0.09**<br>(0.04)  | -0.35<br>(0.48)    | -0.00<br>(0.05)    | -1.13**<br>(0.52)  |
| Income                    | -0.06*<br>(0.04)   | -0.08**<br>(0.04)  | 0.07<br>(0.56)     | 0.08<br>(0.05)     | 0.31<br>(0.53)     |
| Latino X Income           | -0.03<br>(0.09)    | -0.07<br>(0.09)    | 0.16<br>(1.07)     | 0.11<br>(0.11)     | 1.80<br>(1.14)     |
| Education                 | -0.07<br>(0.09)    | 0.24***<br>(0.09)  | 0.68<br>(1.07)     | -0.59***<br>(0.11) | -1.74<br>(1.28)    |
| Latino X Educ.            | -0.21<br>(0.15)    | -0.35**<br>(0.17)  | -3.89**<br>(1.70)  | 0.72***<br>(0.19)  | -0.91<br>(1.86)    |
| Constant                  | 0.41***<br>(0.09)  | 0.30***<br>(0.10)  | (1.20)<br>0.54     | 0.72***<br>(0.13)  | 4.04***<br>(1.30)  |
| N                         | 2,141              | 1,945              | 1,500              | 2,107              | 1,793              |
| R-squared/F-stat          | 0.18               | 0.28               | 7.03               | 0.15               | 13.88              |

Source: 2008 ANES. Cell entries are unstandardized OLS regression coefficients (standard errors in parentheses). All variables coded 0 to 1; analyses weighted for national representativeness.

*Table A40. Mean Values of Covariates from Models in Table 4.*

|                               | Whites | Latinos |
|-------------------------------|--------|---------|
| Neg. Stereotypes - Blacks     | .468   | .482    |
| Denial of Sympathy for Blacks | .557   | .537    |
| Partisanship (Republican)     | .521   | .381    |
| Limited Government            | .449   | .276    |
| Egalitarianism                | .597   | .644    |
| Age                           | .405   | .326    |
| Income                        | .408   | .360    |
| Education                     | .808   | .751    |

Source: 2008 ANES. All variables coded from 0 to 1. Analyses weighted for national representativeness.

**Appendix 9. Bivariate Patterns, FTF and Web interviews combined, 2012 ANES**

**Figure A1: Public Opinion and Vote Choice in 2012, FTF and Web, by Race/Ethnicity**

Proportion of groups supporting policy  
(2012 ANES, 95% Confidence Interval)

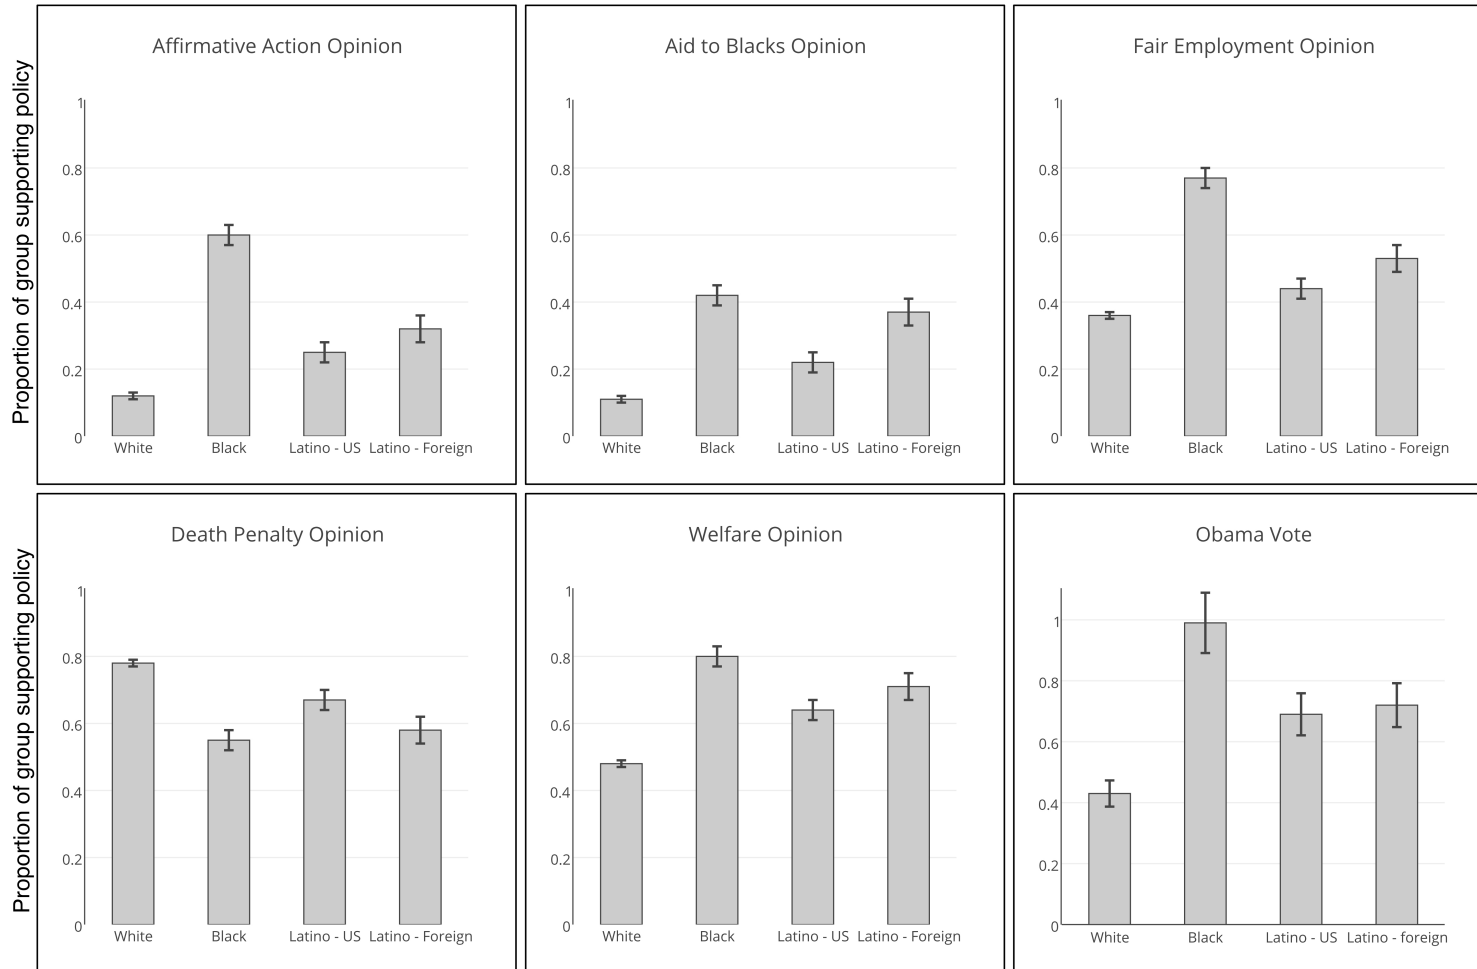

**Figure A2: Prejudice Against Blacks by Race/Ethnicity, FTF and Web Interviews**  
 2012 ANES, 95% Confidence Intervals

Figure A2a: Negative Stereotypes About Blacks

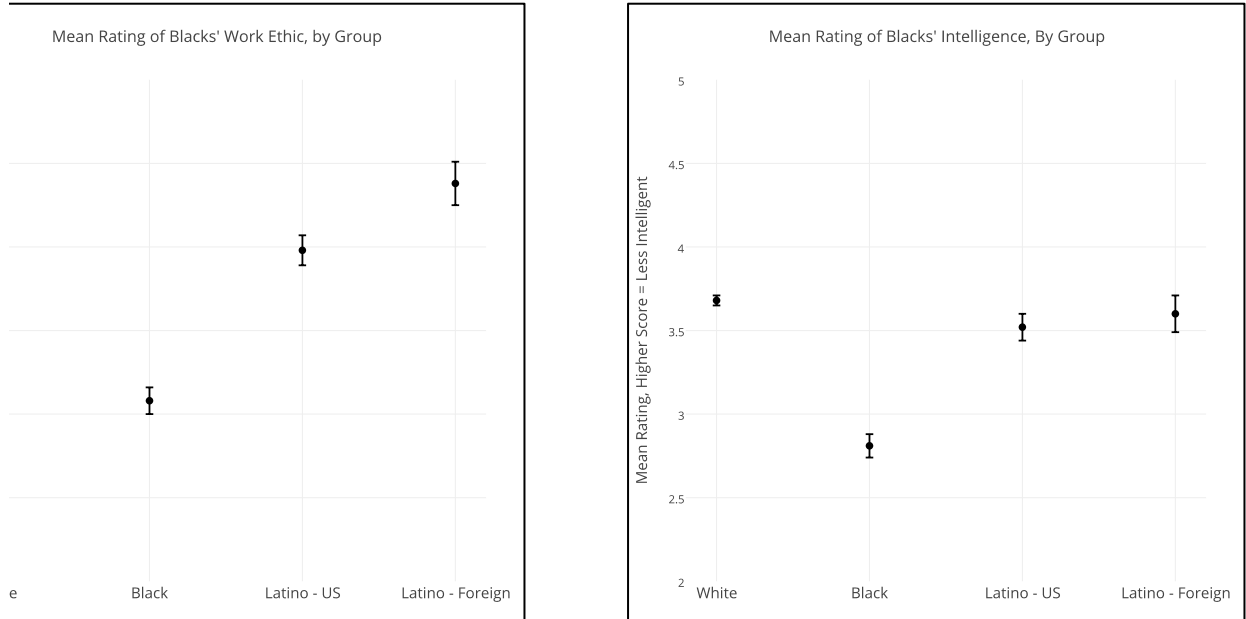

Figure A2b: Sympathy for Blacks

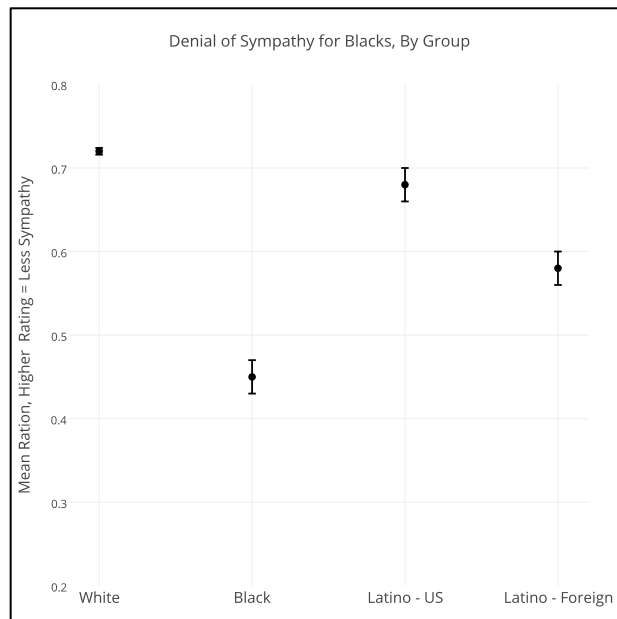

### **References Included in the Appendix**

Hanmer, Michael J., and Kerem Ozan Kalkan. 2013. "Behind the curve: Clarifying the best approach to calculating predicted probabilities and marginal effects from limited dependent variable models." *American Journal of Political Science* 57: 263-277.

Kinder, Donald R., and Nicholas Winter. 2001. "Exploring the racial divide: Blacks, whites, and opinion on national policy." *American Journal of Political Science*: 439-456.
